# Supplementary material for: Inter-domain flexibility and AI-guided sequence optimization enhance de novo enzyme function
Source: Research Square preprint supplement (doi:10.21203/rs.3.rs-6744712/v1), 2025-07-24
Supplement: Supplementary file 1 [file 13c3dfa021fff0439c946fa0.pdf]

## **Inter-domain flexibility and AI-guided sequence optimization enhance de novo enzyme function**

Paula Wagner Egea<sup>1,#</sup>, Florent Delhommel,<sup>2,3,#</sup> Ghulam Mustafa<sup>1</sup>, Florian Leiss-Maier<sup>1</sup>, Lisa Klimper,<sup>1</sup> Thomas Badmann,<sup>1</sup> Anna Heider,<sup>1</sup> Idoia Wille,<sup>1</sup> Michael Groll<sup>1</sup>, Michael Sattler,<sup>2,3</sup> Cathleen Zeymer<sup>1,4,\*</sup>

<sup>1</sup> Center for Functional Protein Assemblies & Department of Bioscience, TUM School of Natural Sciences, Technical University of Munich (TUM), 85748 Garching, Germany

<sup>2</sup> Bavarian NMR Center & Department of Bioscience, TUM School of Natural Sciences, Technical University of Munich (TUM), 85748 Garching, Germany

<sup>3</sup> Institute of Structural Biology, Molecular Targets and Therapeutics Center, Helmholtz Munich, 85764 Neuherberg, Germany

<sup>4</sup> TUM Catalysis Research Center, Technical University of Munich (TUM), 85748 Garching, Germany

\* E-mail: [cathleen.zeymer@tum.de](mailto:cathleen.zeymer@tum.de)

# These authors contributed equally.

# Table of contents

|                                                                                |           |
|--------------------------------------------------------------------------------|-----------|
| <b>SUPPLEMENTARY INFORMATION</b>                                               | <b>1</b>  |
| <b>S1–MOLECULAR CLONING AND SEQUENCES</b>                                      | <b>5</b>  |
| S1.1–Molecular cloning                                                         | 5         |
| S1.2–DNA and protein sequences of all constructs                               | 7         |
| <b>S2–CRYSTALLOGRAPHIC DATA</b>                                                | <b>10</b> |
| S2.1–Crystallographic parameters                                               | 10        |
| S2.2–Crystal structures of TFD-EE, TFD-EH, and TFD-EH T87E                     | 16        |
| <b>S3–BIOPHYSICAL CHARACTERIZATION OF THE SCAFFOLDS</b>                        | <b>18</b> |
| S3.1–Circular dichroism spectra of TFD variants                                | 18        |
| S3.2–SEC-SLS data of TFD variants                                              | 19        |
| <b>S4–PROTEIN NUCLEAR MAGNETIC RESONANCE SPECTROSCOPY</b>                      | <b>20</b> |
| S4.1–Backbone Assignment of TFD-EE                                             | 20        |
| S4.2–Backbone Assignment of TFD-EH                                             | 21        |
| S4.3–Metal titrations to TFD-QQ                                                | 22        |
| S4.4–Metal titrations to TFD-EH and TFD-EH T87E                                | 23        |
| S4.5–NMR characterization of TIM-EE                                            | 24        |
| S4.6–Conformational ensemble analysis based on NMR pseudo-contact shifts (PCS) | 25        |
| <b>S5–MOLECULAR DYNAMICS SIMULATIONS</b>                                       | <b>26</b> |
| S5.1–RMSD analysis                                                             | 26        |
| S5.2–RMSF analysis                                                             | 28        |
| S5.3–Dihedral angles                                                           | 29        |
| S5.4–Principal component analysis (PCA)                                        | 30        |
| S5.5–Interface energy analysis ( $\Delta G$ )                                  | 32        |
| <b>S6–RADICAL DIOL CLEAVAGE OF (<i>R,R</i>)-HYDROBENZOIN</b>                   | <b>33</b> |
| S6.1–Reaction mechanism                                                        | 33        |
| <b>S7–PROTEIN INTERACTIONS ANALYSIS</b>                                        | <b>34</b> |
| S7.1–Multiple Sequence Alignment (MSA) of the TFD-EE variants                  | 34        |
| S7.2–ProtInter Calculator                                                      | 35        |
| <b>S8–REFERENCES</b>                                                           | <b>46</b> |

# List of Tables

|                                                                                                                                                        |    |
|--------------------------------------------------------------------------------------------------------------------------------------------------------|----|
| <b>Table S-I.</b> Composition of PCR reactions.                                                                                                        | 5  |
| <b>Table S-II.</b> General PCR program used for the amplification of fragments and linearized vectors                                                  | 5  |
| <b>Table S-III.</b> Primers used for cloning.                                                                                                          | 6  |
| <b>Table S-IV.</b> General program used for the hybridization of the linearized vectors following SLIM.                                                | 6  |
| <b>Table S-V.</b> Crystallization conditions                                                                                                           | 10 |
| <b>Table S-VI</b> Crystallographic data collection and refinement statistics of TFD-EH apo and TFD-EH:Cu <sup>II</sup>                                 | 11 |
| <b>Table S-VII</b> Crystallographic data collection and refinement statistics of TFD-EH:Ni <sup>II</sup>                                               | 12 |
| <b>Table S-VIII</b> Crystallographic data collection and refinement statistics of TFD-EH T87E:Zn <sup>II</sup> and TFD-EH T87E:Co <sup>II</sup>        | 13 |
| <b>Table S-IX</b> Crystallographic data collection and refinement statistics of TFD-EE MPNN:Tb <sup>III</sup>                                          | 15 |
| <b>Table S-X.</b> Summary from ProtInter Calculator for [TFD-EE, PDB: 6ZV9]. Intermolecular Interactions of Chain A and Chain B                        | 35 |
| <b>Table S-XI.</b> Summary from ProtInter Calculator for [TFD-EE, PDB: 6ZV9]. Intermolecular Interface Interactions Between Chain A and Chain B        | 39 |
| <b>Table S-XII.</b> Summary from ProtInter Calculator for [TFD-EE MPNN, PDB: 9QUP]. Intermolecular Interactions of Chain A and Chain B                 | 40 |
| <b>Table S-XIII.</b> Summary from ProtInter Calculator for [TFD-EE MPNN, PDB: 9QUP]. Intermolecular Interface Interactions Between Chain A and Chain B | 44 |

# List of Figures

|                                                                                                                                            |    |
|--------------------------------------------------------------------------------------------------------------------------------------------|----|
| <b>Figure S1.</b> Crystal Structures of TFD-EE, TFD-EH, and TFD-EH T87E With Metal Ions.                                                   | 17 |
| <b>Figure S2.</b> Circular Dichroism Spectra of TFD-EE, TFD-EH, and TFD-EH T87E.                                                           | 18 |
| <b>Figure S3.</b> Circular Dichroism Spectra of The TFD-EE and TFD-EE MPNN.                                                                | 19 |
| <b>Figure S4.</b> SEC-SLS Profiles of TFD-QQ, TFD-EH, And TFD-EH T87E.                                                                     | 19 |
| <b>Figure S5.</b> Backbone Resonances Assignment of La <sup>III</sup> -Bound TFD-EE by NMR.                                                | 20 |
| <b>Figure S6.</b> Backbone Resonances Assignment of Metal-Free TFD-EH by NMR.                                                              | 21 |
| <b>Figure S7.</b> NMR Characterization of TFD-QQ, the Metal-Binding “Knockout” Variant of TFD-EE, in the Presence of Different Metal Ions. | 22 |
| <b>Figure S8.</b> NMR Titrations to Observe Metal Binding to TFD-EH and TFD-EH T87E                                                        | 23 |
| <b>Figure S9.</b> NMR Characterization of TIM-EE, a Truncated Variant of TFD-EE in Which the Ferredoxin (FD) Domain Has Been Excised.      | 24 |
| <b>Figure S10.</b> Ensemble Analysis of PCS Data from TFD-EE.                                                                              | 25 |
| <b>Figure S11.</b> Time Evolution of the Root-Mean-Square Deviations (RMSD) for All TFD Variants.                                          | 26 |
| <b>Figure S12.</b> Per-Residue RMSD Calculation of All TFD Variants.                                                                       | 27 |
| <b>Figure S13.</b> Root-Mean-Square Fluctuation (RMSF) Plots for TFD-EE MPNN.                                                              | 28 |
| <b>Figure S14.</b> Side Chain Dihedral Angle (X1, X2) Distributions For Key Metal-Coordinating Residues in All TFD Variants.               | 29 |
| <b>Figure S15.</b> PCA Density Plots of All TFD Variants.                                                                                  | 30 |
| <b>Figure S16.</b> Representative Pseudo-Trajectories Extracted from the Principal Component Analysis of TFD Variants.                     | 31 |
| <b>Figure S17.</b> Analysis of the Free Energy Contributions of Dimer Interface Residues Calculated from MD Simulations.                   | 32 |
| <b>Figure S18.</b> Photocatalytic Radical Cleavage of ( <i>R,R</i> )-Hydrobenzoin via Cerium-Bound Enzyme Catalysis.                       | 33 |
| <b>Figure S19.</b> Multiple Sequence Alignment of TFD-EE and TFD-EE MPNN.                                                                  | 34 |

# S1–MOLECULAR CLONING AND SEQUENCES

## S1.1–Molecular cloning

Synthetic genes were ordered from Twist Bioscience (South San Francisco, CA, USA). All PCR reactions were performed as described in **Table S–I** and **Table S–II** using primers described in **Table S–III**. All vectors were assembled using an isothermal Gibson Assembly (1 h, 50 °C). Single point mutations were introduced according to the QuikChange protocol from New England Biolabs Q5 High-Fidelity DNA Polymerase protocol or Site-directed Ligase-Independent Mutagenesis (SLIM) method [1] with the corresponding primers for the point mutation (**Table S–III**).

Table S–I. Composition of PCR reactions.

| Component                                                                        | Amount   | Final concentration |
|----------------------------------------------------------------------------------|----------|---------------------|
| dNTPs (10 mM)                                                                    | 1 µL     | 0.2 mM              |
| Template DNA (100 ng/µL)                                                         | 1 µL     | 2 ng/µL             |
| Primer for (10 mM)                                                               | 2.5 µL   | 0.5 mM              |
| Primer rev (10 mM)                                                               | 2.5 µL   | 0.5 mM              |
| Q5 buffer (5x)                                                                   | 10 µL    | 1x                  |
| Q5 High-Fidelity polymerase                                                      | 1 µL     | –                   |
| DMSO                                                                             | 1.5 µL   | 3 %                 |
| <i>add ddH<sub>2</sub>O with 6% glycerol (v/v), 0.01% bromophenol blue (w/v)</i> | to 50 µL |                     |

Amplification of the fragments and linearized vectors was confirmed by agarose gel electrophoresis. DpnI digestion (37 °C, 1 h or overnight) was performed to remove methylated template DNA from PCR-amplified products. The purification of those products was achieved either by using the PCR Purification Kit (Jena Bioscience GmbH, Jena, Germany) or after agarose gel electrophoresis from respective bands using the Monarch DNA Gel Extraction Kit (New England Biolabs GmbH, Frankfurt am Main, Germany).

Table S–II. General PCR program used for the amplification of fragments and linearized vectors.

| Step                 | Temp. [°C]                      | Duration | Cycle |
|----------------------|---------------------------------|----------|-------|
| Initial denaturation | 98                              | 3 min    |       |
| Denaturation         | 98                              | 10 s     |       |
| Annealing            | Primer dep. (-0.5 °C per cycle) | 30 s     | 10x   |
| Elongation           | 72                              | 30 s/kbp |       |
| Denaturation         | 98                              | 10 s     |       |
| Annealing            | Primer dep.                     | 30 s     | 17x   |
| Elongation           | 72                              | 30 s/kbp |       |
| Final elongation     | 72                              | 5 min    |       |

Table S–III. Primers used for cloning.

| Primer # | Sequence (5'-3')                              | Comment / Construct                                  |
|----------|-----------------------------------------------|------------------------------------------------------|
| 1        | TAATACGACTCACTATAGGG                          | T7 promotor                                          |
| 2        | GCTAGTTATTGCTCAGCGG                           | T7 terminator                                        |
| 3        | GCCAAGCAGATCGCCGTGCACTCTGATGACTGGCGAAT<br>AC  | TFD-EE E154H for                                     |
| 4        | GTATTCGCCAGTCATCAGAGTGACGGCGATCTGCTTG<br>GC   | TFD-EE E154H rev                                     |
| 5        | AGCCTTGATGGAAACGACTTAAACATC                   | TFD-EH T87E short for                                |
| 6        | CCACCATTGAACTTAGCCTTGATGGAAACGACTTAAACA<br>TC | TFD-EH T87E long for                                 |
| 7        | CCCCGAACTTCAGCGCT                             | TFD-EH T87E short rev                                |
| 8        | AAGTTCAATGGTGGCCCCGAACTTCAGCG                 | TFD-EH T87E long rev                                 |
| 9        | AACGGCGGCGGTGGTGATGTGGACGAAATGTTAAAGC<br>AG   | Take out Ferredoxin<br>domain from TFDs long for     |
| 10       | GTGGACGAAATGTTAAAGCAG                         | Take out Ferredoxin<br>domain from TFDs short<br>for |
| 11       | AACGATGAGGATATCACCACCC                        | Take out Ferredoxin<br>domain from TFDs short<br>rev |
| 12       | ATCACCACCGCCGCGTTAACGATGAGGATATCACCAC<br>CC   | Take out Ferredoxin<br>domain from TFDs long rev     |

The purified products were hybridized according to the SLIM protocol in **Table S–IV**. After hybridization, chemically competent *E. coli* DH10 $\beta$  cells were transformed by heat shock: following the addition of the assembly mixture, cells were incubated on ice for 30 min, followed by 60-75 s heat shock at 42 °C, addition of 500  $\mu$ L LB medium or SOC medium (20 g/L tryptone, 5 g/L yeast extract, 584 mg/L sodium chloride, 186 mg/L potassium chloride, 2 g/L magnesium chloride hexahydrate, 1204 mg/L magnesium sulfate, 3.6 g/L glucose) and incubation for 1 h at 37 °C while shaking at 650 rpm. Afterward, transformed cells were cultivated overnight on kanamycin-containing LB agar plates at 37 °C. The successful assembly of the desired vector was tested by colony PCR and sequences were verified by Sanger sequencing (GENEWIZ Germany GmbH, Leipzig, Germany).

Table S–IV. General program used for the hybridization of the linearized vectors following SLIM.

| Step                 | Temp. [°C] | Duration [min] |
|----------------------|------------|----------------|
| Initial Denaturation | 98         | 3              |
| Annealing            | 65         | 5              |
| Hybridization step 1 | 30         | 40             |
| Annealing            | 65         | 5              |
| Hybridization step 2 | 30         | 40             |

## S1.2–DNA and protein sequences of all constructs

### 1. Starting scaffold: TFD-EE (E31, E154)

PDB code: 6ZV9

#### N-His6x-TEV (cleavable) (pET-M11 vector)

Full-length protein:  $M_w = 21880.26$  Da,  $\epsilon_{280} = 19480$  M<sup>-1</sup>cm<sup>-1</sup>

TEV-cleaved protein:  $M_w = 18881.96$  Da,  $\epsilon_{280} = 16500$  M<sup>-1</sup>cm<sup>-1</sup>

ATGAAACATCACCATCACCATCACCCCATGAGCGATTACGACATCCCCACTACTGAGAATCTTTATTTTCA  
GGGC GCCATGGGTGATATTTTGATTGTGTGGGCTAAGGACGTGGATGAAATGCTGAAACAAGTTGAGATTT  
TACGCCGTCTTGGAGCGAAACAAATTGCAGTACAATCCTCGGATTGGCGTATCTTACAGGAAGCACTGAAA  
AAGGGTGGTGATATCCTCATCGTTAACGGCGCGGAATGACAATTACTTTTCGCGGGGATGACCTTGAAGC  
GTTACTGAAAGCGGCTATCGAGATGATCAAACAAGCGCTGAAGTTCGGGGCCACCATTACCCTTAGCCTTG  
ATGGAAACGACTTAAACATCAATATCACAGGTGTCCCGGAACAGGTACGCAAGGAATTGGCCAAAGAAGCA  
GAGCGTTTACGCTAAAGAATTTGGAATTACGGTCACGCGCACTGGGGGTGGTGATGTGGACGAAATGTTAAA  
GCAGGTAGAAATTCTTCGTCGCTTAGGGGCAAAACAAATCGCTGTCGAAAGTGATGACTGGCGCATTCTCC  
AGGAAGCCCTCAAAAAGGGCTAA

MKHHHHHPMSDYDIPTTENLYFQAMGDILIVWAKDVDEMLKQVEILRRLGAKQIAVESDWRILQEALK  
KGGDILIVNGGGMITIFRGDDLEALLKAAIEMIKQALKFGATITLSLDGNDLNINITGVPEQVRKELAKEA  
ERLAKEFGITVTRTGGGDVDEMLKQVEILRRLGAKQIAVESDWRILQEALKKG\*

### 2. TFD-QQ (Q31, Q154)

#### N-His6x-TEV (cleavable) (pET-M11 vector)

Full-length protein:  $M_w = 21878.29$  Da,  $\epsilon_{280} = 19480$  M<sup>-1</sup>cm<sup>-1</sup>

TEV-cleaved protein:  $M_w = 18879.99$  Da,  $\epsilon_{280} = 16500$  M<sup>-1</sup>cm<sup>-1</sup>

ATGAAACATCACCATCACCATCACCCCATGAGCGATTACGACATCCCCACTACTGAGAATCTTTATTTTCA  
GGGC GCCATGGGTGATATTTTGATTGTGTGGGCTAAGGACGTGGATGAAATGCTGAAACAAGTTGAGATTT  
TACGCCGTCTTGGAGCGAAACAAATTGCAGTACAATCCTCGGATTGGCGTATCTTACAGGAAGCACTGAAA  
AAGGGTGGTGATATCCTCATCGTTAACGGCGCGGAATGACAATTACTTTTCGCGGGGATGACCTTGAAGC  
GTTACTGAAAGCGGCTATCGAGATGATCAAACAAGCGCTGAAGTTCGGGGCCACCATTACCCTTAGCCTTG  
ATGGAAACGACTTAAACATCAATATCACAGGTGTCCCGGAACAGGTACGCAAGGAATTGGCCAAAGAAGCA  
GAGCGTTTACGCTAAAGAATTTGGAATTACGGTCACGCGCACTGGGGGTGGTGATGTGGACGAAATGTTAAA  
GCAGGTAGAAATTCTTCGTCGCTTAGGGGCAAAACAAATCGCTGTCGAAAGTGATGACTGGCGCATTCTCC  
AGGAAGCCCTCAAAAAGGGCTAA

MKHHHHHPMSDYDIPTTENLYFQAMGDILIVWAKDVDEMLKQVEILRRLGAKQIAVQSSDWRILQEALK  
KGGDILIVNGGGMITIFRGDDLEALLKAAIEMIKQALKFGATITLSLDGNDLNINITGVPEQVRKELAKEA  
ERLAKEFGITVTRTGGGDVDEMLKQVEILRRLGAKQIAVQSSDWRILQEALKKG\*

### 3. TFD-EH (E31, H154)

PDB codes: 9QUC, 9QUD, 9QUI

**N-His6x-TEV (cleavable) (pET-M11 vector)**

Full-length protein:  $M_w = 21888.29$  Da,  $\epsilon_{280} = 19480$  M<sup>-1</sup>cm<sup>-1</sup>

TEV-cleaved protein:  $M_w = 18889.99$  Da,  $\epsilon_{280} = 16500$  M<sup>-1</sup>cm<sup>-1</sup>

ATGAAACATCACCATCACCATCACCCATGAGCGATTACGACATCCCCACTACTGAGAATCTTTATTTTCA  
GGGC GCCATGGGTGATATTTTGATTGTGTGGGCTAAGGACGTGGATGAAATGCTGAAACAAGTTGAGATTT  
TACGCCGTCTTGGAGCGAAACAAATTGCAGTAGAATCCTCGGATTGGCGTATCTTACAGGAAGCACTGAAA  
AAGGGTGGTGATATCCTCATCGTTAACGGCGCGGAATGACAATTACTTTTCGCGGGGATGACCTTGAAGC  
GTTACTGAAAGCGGCTATCGAGATGATCAAACAAGCGCTGAAGTTCGGGGCCACCATTACCCTTAGCCTTG  
ATGGAAACGACTTAAACATCAATATCACAGGTGTCCCGGAACAGGTACGCAAGGAATTGGCCAAAGAAGCA  
GAGCGTTTAGCTAAAGAATTTGGAATTACGGTCACGCGCACTGGGGGTGGTGATGTGGACGAAATGTTAAA  
GCAGGTAGAAATTCCTCGTCGCTTAGGGGCAAAACAAATCGCTGTCACAGTGATGACTGGCGCATTCTCC  
AGGAAGCCCTCAAAAAGGGCTAA

MKHHHHHPMSDYDIPTTENLYFQAMGDILIVWAKDVDEMLKQVEILRRLGAKQIAVESDWRILQEALK  
KGGDILIVNGGGM TITFRGDDLEALLKAAIEMIKQALKFGATITLSLDGNDLNINITGVPEQVRKELAKEA  
ERLAKEFGITVTRTGGGDVDEMLKQVEILRRLGAKQIAVHSDWRILQEALKKG\*

### 4. TFD-EH T87E (E31, E87, H154)

PDB codes: 9QUL, 9QUO

**N-His6x-TEV (cleavable) (pET-M11 vector)**

Full-length protein:  $M_w = 21916.30$  Da,  $\epsilon_{280} = 19480$  M<sup>-1</sup>cm<sup>-1</sup>

TEV-cleaved protein:  $M_w = 18918.00$  Da,  $\epsilon_{280} = 16500$  M<sup>-1</sup>cm<sup>-1</sup>

ATGAAACATCACCATCACCATCACCCATGAGCGATTACGACATCCCCACTACTGAGAATCTTTATTTTCA  
GGGC GCCATGGGTGATATTTTGATTGTGTGGGCTAAGGACGTGGATGAAATGCTGAAACAAGTTGAGATTT  
TACGCCGTCTTGGAGCGAAACAAATTGCAGTAGAATCCTCGGATTGGCGTATCTTACAGGAAGCACTGAAA  
AAGGGTGGTGATATCCTCATCGTTAACGGCGCGGAATGACAATTACTTTTCGCGGGGATGACCTTGAAGC  
GTTACTGAAAGCGGCTATCGAGATGATCAAACAAGCGCTGAAGTTCGGGGCCACCATTGAACTTAGCCTTG  
ATGGAAACGACTTAAACATCAATATCACAGGTGTCCCGGAACAGGTACGCAAGGAATTGGCCAAAGAAGCA  
GAGCGTTTAGCTAAAGAATTTGGAATTACGGTCACGCGCACTGGGGGTGGTGATGTGGACGAAATGTTAAA  
GCAGGTAGAAATTCCTCGTCGCTTAGGGGCAAAACAAATCGCTGTCACAGTGATGACTGGCGCATTCTCC  
AGGAAGCCCTCAAAAAGGGCTAA

MKHHHHHPMSDYDIPTTENLYFQAMGDILIVWAKDVDEMLKQVEILRRLGAKQIAVESDWRILQEALK  
KGGDILIVNGGGM TITFRGDDLEALLKAAIEMIKQALKFGATIELSLDGNDLNINITGVPEQVRKELAKEA  
ERLAKEFGITVTRTGGGDVDEMLKQVEILRRLGAKQIAVHSDWRILQEALKKG\*



## 5. TIM-barrel of TFD-EE (TIM-EE) (E31, E154)

### N-His6x-TEV (cleavable) (pET-M11 vector)

Full-length protein:  $M_w = 13750.84$  Da,  $\epsilon_{280} = 19480$  M<sup>-1</sup>cm<sup>-1</sup>

TEV-cleaved protein:  $M_w = 10752.54$  Da,  $\epsilon_{280} = 16500$  M<sup>-1</sup>cm<sup>-1</sup>

ATGAAACATCACCATCACCATCACCCCATGAGCGATTACGACATCCCCACTACTGAGAATCTTTATTTTCA  
GGGCGCCATGGGTGATATTTTGATTGTGTGGGCTAAGGACGTGGATGAAATGCTGAAACAAGTTGAGATTT  
TACGCCGTCTTGAGCGAAACAAATTGCAGTAGAATCCTCGGATTGGCGTATCTTACAGGAAGCACTGAAA  
AAGGGTGGTGATATCCTCATCGTTAACGGCGCGGGGGTGGTGATGTGGACGAAATGTTAAAGCAGGTAGA  
AATTCTTCGTCGCTTAGGGGCAAAACAAATCGCTGTCGAAAGTGATGACTGGCGCATTCTCCAGGAAGCCC  
TCAAAAAGGGCTAA

MKHHHHHHPMSDYDIPPTTENLYFQAMGDILIVWAKDVDEMLKQVEILRRLGAKQIAVESDWRILQEALK  
KGGDILIVNGGGGDVDEMLKQVEILRRLGAKQIAVESDWRILQEALKKG\*

## 6. TFD-EE MPNN (E31, E154)

PDB code: 9QUP

### N-His6x-TEV (cleavable) (pET29b(+)) vector)

Full-length protein:  $M_w = 21629.96$  Da,  $\epsilon_{280} = 19480$  M<sup>-1</sup>cm<sup>-1</sup>

TEV-cleaved protein:  $M_w = 18631.66$  Da,  $\epsilon_{280} = 16500$  M<sup>-1</sup>cm<sup>-1</sup>

ATGAAACACCATCATCACCACCATCCGATGTCCGATTATGACATTCCTACCACGGAAAATCTGTACTTTCA  
AGGGGCTATGGGCATGATGACTTTTATAGTTTGGGCTCTGAATAAAGATGAGATGCTCAAAAATATAGAAG  
CTCTGCGCAAAGCCGGTGCAAAAATATAGCAGTAGAATCAGGAGATTTTGACATACTTCGCGCCGCGATT  
GAAGCGGGCGTCGAAACCATCGTCGTTTCTGGGGGAGGTCTCACCATCGTCTTCACTGGCGCTGACCGGGC  
CGCGCTGCGGCGCGCTGCAAAACGTCTCCTGGATGCGGCCCTTGGAACCTGGGTGCTGTGCTAACAGTAGCTT  
TAGATGGCGATGCACCTTCGCGTTCGTATTACGGGCGTTCCAGAGCAAGATCTGGAGAGATTGAGAGCTCTG  
GCCCCGTAAGTGGCTGCGGAATTTGGTATTGAGGTGGAGGTTAGAGGGGGTGGAAACCCCGAACGCGCATT  
GCGTGAAATTCAGGAATTGCGCGAACTCGGAGCCAAAAATATTTGGGTGAGTCGGCAAACGTAGATTGGC  
TGCTTAAACTTCTGAAACTGAGCTGA

MKHHHHHHPMSDYDIPPTTENLYFQAMGMTFIVWALNKDEMLKNIEALRKAGAKNIAVESGDFDILRAAI  
EAGVETIVVSGGLTIVFTGADRAALRRAAKRLLDAALELGAVVTVALDGDALRVKITGVPEQDLERLRL  
ARELAAEFGIEVEVRGGGTPERALREIQELRELGAKNIWVESANVDWLLKLLKLS\*

## S2–CRYSTALLOGRAPHIC DATA

### S2.1–Crystallographic parameters

Table S–V. Crystallization conditions

| Structure                                              | Preparation method | Incubation temperature [°C] | Protein to reservoir ratio [μL/μL] | Protein solution                                                                   | Reservoir solution                                        |
|--------------------------------------------------------|--------------------|-----------------------------|------------------------------------|------------------------------------------------------------------------------------|-----------------------------------------------------------|
| <b>Metal-free TFD-EH</b><br>PDB code: 9QUC             | Hanging drop       | 4                           | 1.0/1.0                            | 10 mg/mL protein<br>1 mM CuCl <sub>2</sub><br>25 mM HEPES<br>pH 7.0                | 20 % (w/v)<br>PEG 3350<br>0.1 M Potassium citrate         |
| <b>TFD-EH+Cu<sup>II</sup></b><br>PDB code: 9QUD        | Hanging drop       | 20                          | 1.0/1.0                            | 9 mg/mL protein<br>2 mM CuCl <sub>2</sub><br>25 mM HEPES<br>pH 7.0                 | 12 % (w/v)<br>PEG 6000<br>0.05 M imidazole<br>pH 7.0      |
| <b>TFD-EH+Ni<sup>II</sup></b><br>PDB code: 9QUI        | Hanging drop       | 20                          | 1.0/1.0                            | 9 mg/mL protein<br>2 mM NiCl <sub>2</sub><br>25 mM HEPES<br>pH 7.0                 | 12 % (w/v)<br>PEG 6000<br>0.05 M imidazole<br>pH 8.5      |
| <b>TFD-EH T87E+Zn<sup>II</sup></b><br>PDB code: 9QUL   | Hanging drop       | 20                          | 1.0/1.0                            | 9 mg/mL protein<br>2 mM ZnCl <sub>2</sub><br>25 mM HEPES<br>pH 7.0                 | 16 % (w/v)<br>PEG 6000<br>0.05 M imidazole<br>pH 7.0      |
| <b>TFD-EH T87E+Co<sup>II</sup></b><br>PDB code: 9QUO   | Hanging drop       | 20                          | 1.0/1.0                            | 9 mg/mL protein<br>2 mM CoCl <sub>2</sub><br>25 mM HEPES<br>pH 7.0                 | 14 % (w/v)<br>PEG 6000<br>0.05 M imidazole<br>pH 7.0      |
| <b>TFD-EE MPNN +Tb<sup>III</sup></b><br>PDB code: 9QUP | Sitting drop       | 20                          | 0.2/0.1                            | 9 mg/mL protein<br>250 μM TbCl <sub>3</sub><br>25 mM HEPES<br>pH 7.5<br>25 mM NaCl | 25 % (w/v)<br>PEG 3350<br>0.1 M Tris pH 8.5<br>0.2 M NaCl |

Table S-VI Crystallographic data collection and refinement statistics of TFD-EH apo and TFD-EH:Cu<sup>II</sup>

|                                                                     | Metal-free<br>TFD-EH             | TFD-EH+Cu <sup>II</sup>          | TFD-EH+Cu <sup>II</sup><br>[Cu <sup>II</sup> (peak)] |
|---------------------------------------------------------------------|----------------------------------|----------------------------------|------------------------------------------------------|
| Crystal parameters                                                  |                                  |                                  |                                                      |
| Space group                                                         | P3 <sub>1</sub> 21               | P3 <sub>1</sub> 21               | P3 <sub>1</sub> 21                                   |
| Cell constants (Å)                                                  | a = 78.7<br>b = 78.7<br>c = 66.3 | a = 76.8<br>b = 76.8<br>c = 70.0 | a = 76.8<br>b = 76.8<br>c = 70.0                     |
| Subunits / AU <sup>a</sup>                                          | 1                                | 1                                | 1                                                    |
| Data collection                                                     |                                  |                                  |                                                      |
| Beam line                                                           | X06SA, SLS                       | X06SA, SLS                       | X06SA, SLS                                           |
| Wavelength (Å)                                                      | 1.0                              | 1.0                              | 1.377                                                |
| Resolution range (Å) <sup>b</sup>                                   | 30-1.60<br>(1.70-1.60)           | 30-1.95<br>(2.05-1.95)           | 30-2.05<br>(2.15-2.05)                               |
| No. observations                                                    | 192292                           | 73117                            | 123991                                               |
| No. unique reflections <sup>c</sup>                                 | 31409                            | 17755                            | 28979 <sup>#</sup>                                   |
| Completeness (%) <sup>b</sup>                                       | 99.1 (99.4)                      | 99.7 (100.0)                     | 99.8 (100.0)                                         |
| R <sub>merge</sub> (%) <sup>b, d</sup>                              | 3.9 (58.7)                       | 3.3 (68.7)                       | 3.5 (56.8)                                           |
| I/σ(I) <sup>b</sup>                                                 | 20.3 (2.7)                       | 19.0 (2.0)                       | 19.7 (2.7)                                           |
| Refinement (REFMAC5)                                                |                                  |                                  |                                                      |
| Resolution range (Å)                                                | 30-1.60                          | 30-1.95                          |                                                      |
| No. refl. working set                                               | 29824                            | 16856                            |                                                      |
| No. refl. test set                                                  | 1569                             | 887                              |                                                      |
| No. non hydrogen                                                    | 1514                             | 1423                             |                                                      |
| No. of ligand atoms (Cu)                                            | -                                | 1                                |                                                      |
| Solvent (H <sub>2</sub> O, ions, glycerol, PEG, citrate, imidazole) | 194                              | 111                              |                                                      |
| R <sub>work</sub> / R <sub>free</sub> (%) <sup>e</sup>              | 15.7/18.4                        | 16.6/21.8                        |                                                      |
| r.m.s.d. bond (Å) / (°) <sup>f</sup>                                | 0.003/1.1                        | 0.003/1.1                        |                                                      |
| Average B-factor (Å <sup>2</sup> )                                  | 32.2                             | 47.8                             |                                                      |
| Ramachandran plot (%) <sup>g</sup>                                  | 97.6/2.4/0                       | 98.8/1.2/0                       |                                                      |
| PDB-ID                                                              | 9QUC                             | 9QUD                             |                                                      |

[a] Asymmetric unit

[b] The values in parentheses for resolution range, completeness, R<sub>merge</sub> and I/σ (I) correspond to the highest resolution shell[c] Data reduction was carried out with XDS and from a single crystal. <sup>#</sup>Friedel pairs were treated as individual reflections[d]  $R_{\text{merge}}(I) = \sum_{hkl} \sum_j |I(hkl)_j - \langle I(hkl) \rangle| / \sum_{hkl} \sum_j I(hkl)_j$ , where  $I(hkl)_j$  is the  $j^{\text{th}}$  measurement of the intensity of reflection  $hkl$  and  $\langle I(hkl) \rangle$  is the average intensity[e]  $R = \sum_{hkl} | |F_{\text{obs}}| - |F_{\text{calc}}| | / \sum_{hkl} |F_{\text{obs}}|$ , where  $R_{\text{free}}$  is calculated without a sigma cut off for a randomly chosen 5% of reflections, which were not used for structure refinement, and  $R_{\text{work}}$  is calculated for the remaining reflections

[f] Deviations from ideal bond lengths/angles

[g] Number of residues in favored region / allowed region / outlier region

Table S–VII Crystallographic data collection and refinement statistics of TFD-EH:Ni<sup>II</sup>

|                                                                     | TFD-EH+Ni <sup>II</sup>          | TFD-EH+Ni <sup>II</sup><br>[Ni <sup>II</sup> (peak)] |
|---------------------------------------------------------------------|----------------------------------|------------------------------------------------------|
| Crystal parameters                                                  |                                  |                                                      |
| Space group                                                         | P3 <sub>1</sub> 21               | P3 <sub>1</sub> 21                                   |
| Cell constants (Å)                                                  | a = 76.7<br>b = 76.7<br>c = 71.2 | a = 76.7<br>b = 76.7<br>c = 71.2                     |
| Subunits / AU <sup>a</sup>                                          | 1                                | 1                                                    |
| Data collection                                                     |                                  |                                                      |
| Beam line                                                           | P13, PETRA III,<br>DESY          | P13, PETRA III,<br>DESY                              |
| Wavelength (Å)                                                      | 976                              | 1.485                                                |
| Resolution range (Å) <sup>b</sup>                                   | 30-2.10<br>(2.20-2.10)           | 30-2.20<br>(2.30-2.20)                               |
| No. observations                                                    | 72915                            | 132264                                               |
| No. unique reflections <sup>c</sup>                                 | 13957                            | 23819 <sup>#</sup>                                   |
| Completeness (%) <sup>b</sup>                                       | 96.1 (98.7)                      | 99.9 (99.9)                                          |
| R <sub>merge</sub> (%) <sup>b, d</sup>                              | 4.2 (71.0)                       | 7.3 (65.4)                                           |
| I/σ(I) <sup>b</sup>                                                 | 19.4 (2.3)                       | 14.2 (3.8)                                           |
| Refinement (REFMAC5)                                                |                                  |                                                      |
| Resolution range (Å)                                                | 30-2.10                          |                                                      |
| No. refl. working set                                               | 13253                            |                                                      |
| No. refl. test set                                                  | 697                              |                                                      |
| No. non hydrogen                                                    | 1352                             |                                                      |
| No. of ligand atoms (Ni, Co)                                        | 1                                |                                                      |
| Solvent (H <sub>2</sub> O, ions, glycerol, PEG, citrate, imidazole) | 40                               |                                                      |
| R <sub>work</sub> / R <sub>free</sub> (%) <sup>e</sup>              | 18.5/22.3                        |                                                      |
| r.m.s.d. bond (Å) / (°) <sup>f</sup>                                | 0.003/1.2                        |                                                      |
| Average B-factor (Å <sup>2</sup> )                                  | 60.8                             |                                                      |
| Ramachandran Plot (%) <sup>g</sup>                                  | 98.8/1.2/0                       |                                                      |
| PDB-ID                                                              | 9QUI                             |                                                      |

[a] Asymmetric unit

[b] The values in parentheses for resolution range, completeness, R<sub>merge</sub> and I/σ (I) correspond to the highest resolution shell

[c] Data reduction was carried out with XDS and from a single crystal. <sup>#</sup>Friedel pairs were treated as individual reflections

[d]  $R_{\text{merge}}(I) = \sum_{hkl} \sum_j |I(hkl)_j - \langle I(hkl) \rangle| / \sum_{hkl} \sum_j I(hkl)_j$ , where  $I(hkl)_j$  is the  $j^{\text{th}}$  measurement of the intensity of reflection  $hkl$  and  $\langle I(hkl) \rangle$  is the average intensity

[e]  $R = \sum_{hkl} ||F_{\text{obs}}| - |F_{\text{calc}}|| / \sum_{hkl} |F_{\text{obs}}|$ , where R<sub>free</sub> is calculated without a sigma cut off for a randomly chosen 5% of reflections, which were not used for structure refinement, and R<sub>work</sub> is calculated for the remaining reflections

[f] Deviations from ideal bond lengths/angles

[g] Number of residues in favored region / allowed region / outlier region

Table S–VIII Crystallographic data collection and refinement statistics of TFD-EH T87E:Zn<sup>II</sup> and TFD-EH T87E:Co<sup>II</sup>

|                                                                           | TFD-EH<br>T87E+Zn <sup>II</sup>  | TFD-EH<br>T87E+Zn <sup>II</sup><br>[Zn <sup>II</sup> (peak)] | TFD-EH<br>T87E+Co <sup>II</sup>  | TFD-EH<br>T87E+Co <sup>II</sup><br>[Co <sup>II</sup> (peak)] |
|---------------------------------------------------------------------------|----------------------------------|--------------------------------------------------------------|----------------------------------|--------------------------------------------------------------|
| Crystal parameters                                                        |                                  |                                                              |                                  |                                                              |
| Space group                                                               | P3 <sub>1</sub> 21               | P3 <sub>1</sub> 21                                           | P3 <sub>1</sub> 21               | P3 <sub>1</sub> 21                                           |
| Cell constants (Å)                                                        | a = 76.2<br>b = 76.2<br>c = 70.3 | a = 76.2<br>b = 76.2<br>c = 70.3                             | a = 76.4<br>b = 76.4<br>c = 70.8 | a = 76.4<br>b = 76.4<br>c = 70.8                             |
| Subunits / AU <sup>a</sup>                                                | 1                                | 1                                                            | 1                                | 1                                                            |
| Data collection                                                           |                                  |                                                              |                                  |                                                              |
| Beam line                                                                 | P13, PETRA III,<br>DESY          | P13, PETRA III,<br>DESY                                      | P13,<br>PETRA III,<br>DESY       | P13, PETRA<br>III, DESY                                      |
| Wavelength (Å)                                                            | 976                              | 1.282                                                        | 976                              | 1.604                                                        |
| Resolution range<br>(Å) <sup>b</sup>                                      | 30-1.90<br>(2.00-1.90)           | 30-1.85<br>(1.95-1.85)                                       | 30-1.95<br>(2.05-1.95)           | 30-1.95<br>(2.05-1.95)                                       |
| No. observations                                                          | 52145                            | 168701                                                       | 70361                            | 159543                                                       |
| No. unique<br>reflections <sup>c</sup>                                    | 18249 <sup>#</sup>               | 38905 <sup>#</sup>                                           | 17125                            | 33337 <sup>#</sup>                                           |
| Completeness (%) <sup>b</sup>                                             | 96.0 (98.2)                      | 99.8 (100.0)                                                 | 96.2 (98.6)                      | 99.0 (99.7)                                                  |
| R <sub>merge</sub> (%) <sup>b, d</sup>                                    | 5.8 (66.5)                       | 7.7 (56.2)                                                   | 5.3 (51.3)                       | 7.3 (64.7)                                                   |
| I/σ(I) <sup>b</sup>                                                       | 9.3 (1.6)                        | 10.8 (2.5)                                                   | 13.9 (2.7)                       | 12.2 (2.3)                                                   |
| Refinement (REFMAC5)                                                      |                                  |                                                              |                                  |                                                              |
| Resolution range<br>(Å)                                                   | 30-1.90                          |                                                              | 30-1.95                          |                                                              |
| No. refl. working set                                                     | 17330                            |                                                              | 16265                            |                                                              |
| No. refl. test set                                                        | 912                              |                                                              | 856                              |                                                              |
| No. non hydrogen                                                          | 1381                             |                                                              | 1392                             |                                                              |
| No. of ligand atoms<br>(Zn, Co)                                           | 1                                |                                                              | 1                                |                                                              |
| Solvent (H <sub>2</sub> O, ions,<br>glycerol, PEG,<br>citrate, imidazole) | 76                               |                                                              | 78                               |                                                              |
| R <sub>work</sub> / R <sub>free</sub> (%) <sup>e</sup>                    | 18.1/21.9                        |                                                              | 19.0/21.9                        |                                                              |
| r.m.s.d. bond (Å) /<br>(°) <sup>f</sup>                                   | 0.003/1.1                        |                                                              | 0.003/1.2                        |                                                              |
| Average B-factor<br>(Å <sup>2</sup> )                                     | 44.1                             |                                                              | 40.6                             |                                                              |
| Ramachandran Plot<br>(%) <sup>g</sup>                                     | 98.2/1.8/0                       |                                                              | 99.4/0.6/0                       |                                                              |
| PDB-ID                                                                    | 9QUL                             |                                                              | 9QUO                             |                                                              |

[a] Asymmetric unit

[b] The values in parentheses for resolution range, completeness, R<sub>merge</sub> and I/σ (I) correspond to the highest resolution shell

[c] Data reduction was carried out with XDS and from a single crystal. <sup>#</sup>Friedel pairs were treated as individual reflections

- [d]  $R_{\text{merge}}(I) = \sum_{hkl} \sum_j |I(hkl)_j - \langle I(hkl) \rangle| / \sum_{hkl} \sum_j I(hkl)_j$ , where  $I(hkl)_j$  is the  $j^{\text{th}}$  measurement of the intensity of reflection  $hkl$  and  $\langle I(hkl) \rangle$  is the average intensity
- [e]  $R = \sum_{hkl} ||F_{\text{obs}}| - |F_{\text{calc}}|| / \sum_{hkl} |F_{\text{obs}}|$ , where  $R_{\text{free}}$  is calculated without a sigma cut off for a randomly chosen 5% of reflections, which were not used for structure refinement, and  $R_{\text{work}}$  is calculated for the remaining reflections
- [f] Deviations from ideal bond lengths/angles
- [g] Number of residues in favored region / allowed region / outlier region

Table S–IX Crystallographic data collection and refinement statistics of TFD-EE MPNN:Tb<sup>III</sup>

| TFD-EE MPNN:Tb <sup>III</sup>                                       |                                               |
|---------------------------------------------------------------------|-----------------------------------------------|
| Crystal parameters                                                  |                                               |
| Space group                                                         | P2 <sub>1</sub> 2 <sub>1</sub> 2 <sub>1</sub> |
| Cell constants (Å)                                                  | a = 42.98<br>b = 66.44<br>c = 94.37           |
| Subunits / AU <sup>a</sup>                                          | 2                                             |
| Data collection                                                     |                                               |
| Beam line                                                           | P13, PETRA III, DESY                          |
| Wavelength (Å)                                                      | 976                                           |
| Resolution range (Å) <sup>b</sup>                                   | 30-1.95<br>(2.05-1.95)                        |
| No. observations                                                    | 109376                                        |
| No. unique reflections <sup>c</sup>                                 | 20002                                         |
| Completeness (%) <sup>b</sup>                                       | 98.2 (96.1)                                   |
| R <sub>merge</sub> (%) <sup>b, d</sup>                              | 9.7 (78.4)                                    |
| I/σ(I) <sup>b</sup>                                                 | 16.29 (2.51)                                  |
| Refinement (REFMAC5)                                                |                                               |
| Resolution range (Å)                                                | 30-1.95                                       |
| No. refl. working set                                               | 18996                                         |
| No. refl. test set                                                  | 999                                           |
| No. non hydrogen                                                    | 26543                                         |
| No. of ligand atoms (Zn, Co)                                        | 1                                             |
| Solvent (H <sub>2</sub> O, ions, glycerol, PEG, citrate, imidazole) | 55                                            |
| R <sub>work</sub> / R <sub>free</sub> (%) <sup>e</sup>              | 19.6/22.6                                     |
| r.m.s.d. bond (Å) / (°) <sup>f</sup>                                | 0.002/1.144                                   |
| Average B-factor (Å <sup>2</sup> )                                  | 36.9                                          |
| Ramachandran Plot (%) <sup>g</sup>                                  | 100/0/0                                       |
| PDB-ID                                                              | 9QUP                                          |

[a] Asymmetric unit

[b] The values in parentheses for resolution range, completeness, R<sub>merge</sub> and I/σ (I) correspond to the highest resolution shell

[c] Data reduction was carried out with XDS and from a single crystal. #Friedel pairs were treated as individual reflections

[d]  $R_{\text{merge}}(I) = \sum_{hkl} \sum_j |I(hkl)_j - \langle I(hkl) \rangle| / \sum_{hkl} \sum_j I(hkl)_j$ , where  $I(hkl)_j$  is the  $j^{\text{th}}$  measurement of the intensity of reflection  $hkl$  and  $\langle I(hkl) \rangle$  is the average intensity

[e]  $R = \sum_{hkl} ||F_{\text{obs}}| - |F_{\text{calc}}|| / \sum_{hkl} |F_{\text{obs}}|$ , where R<sub>free</sub> is calculated without a sigma cut off for a randomly chosen 5% of reflections, which were not used for structure refinement, and R<sub>work</sub> is calculated for the remaining reflections

[f] Deviations from ideal bond lengths/angles

[g] Number of residues in favored region / allowed region / outlier region



## S2.2–Crystal structures of TFD-EE, TFD-EH, and TFD-EH T87E

**a1** TFD-EE + Tb<sup>III</sup> (PDB: 6ZV9; 1.85 Å)

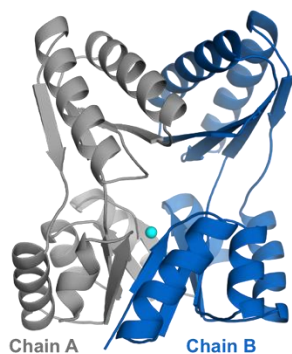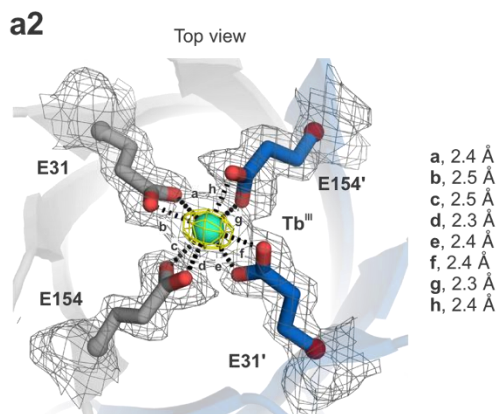

**b1** TFD-EH (PDB: 9QUC; 1.60 Å)

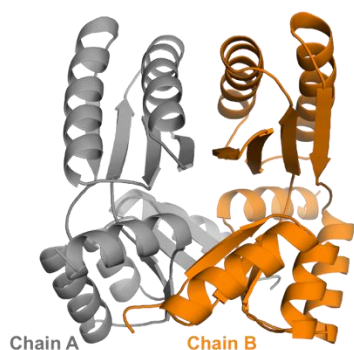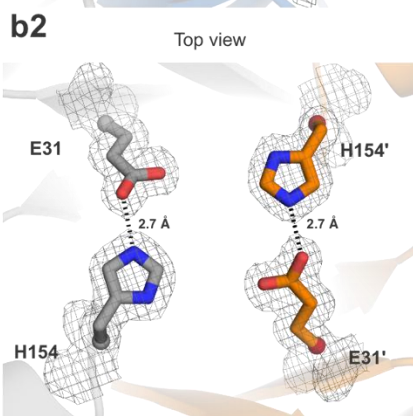

**c1** TFD-EH + Cu<sup>I</sup> (PDB: 9QUD; 1.95 Å)

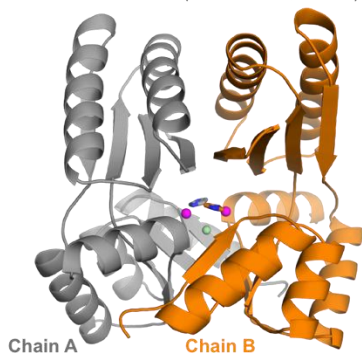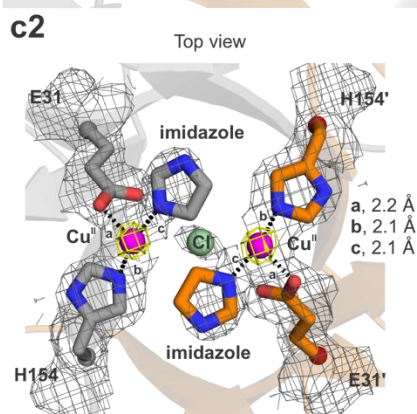

**c3** TFD-EH + Ni<sup>II</sup> (PDB: 9QUL; 2.1 Å)

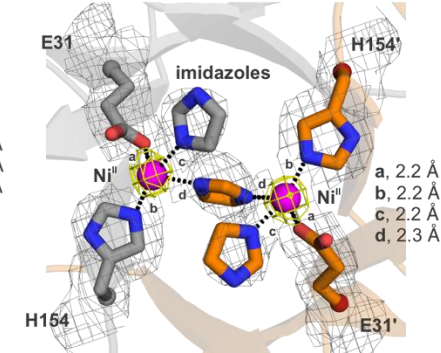

**d1** TFD-EH T87E + Zn<sup>II</sup> (PDB: 9QUL; 1.90 Å)

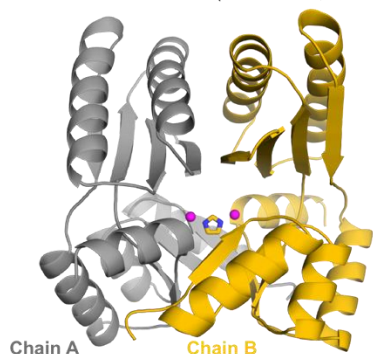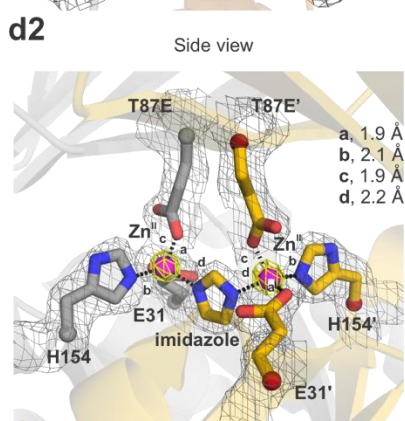

**d3** TFD-EH T87E + Co<sup>II</sup> (PDB: 9QUO; 1.90 Å)

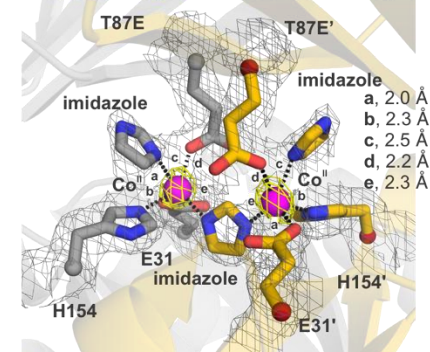



**Figure S1.** Crystal structures of TFD-EE, TFD-EH, and TFD-EH T87E with metal ions.

The protein backbones are shown in cartoon representation, with metal ions as spheres and coordination bonds highlighted as dotted lines. **a1, a2**, TFD-EE bound to Tb<sup>III</sup>, PDB code 6ZV9, showing eight coordination bonds. 2Fo-Fc electron density is shown as a grey mesh contoured at 1.0  $\sigma$ . Anomalous electron density is shown as a yellow mesh at 20.0  $\sigma$ . **b1, b2**, TFD-EH, in the metal-free state, the binding residues are stabilized via hydrogen bonds, PDB code 9QUC. TFD-EH complexed with Cu<sup>II</sup> adopts a square planar geometry (with an unsatisfied charge), PDB code 9QUD. TFD-EH complexed with Ni<sup>II</sup> exhibits tetrahedral coordination, PDB code 9QUI. 2Fo-Fc electron density is shown as a gray mesh contoured at 1.0  $\sigma$ . Anomalous electron density is shown as a yellow mesh at 4.0  $\sigma$  for Cu<sup>II</sup> and 5.0  $\sigma$  for Ni<sup>II</sup>. **c1, c2, c3**, TFD-EH T87E coordinated to Zn<sup>II</sup> and Co<sup>II</sup>, PDB codes 9QUL and 9QUO, respectively. 2Fo-Fc electron density is shown as a gray mesh contoured at 1.0  $\sigma$ . Anomalous electron density is shown as a yellow mesh at 10.0  $\sigma$  for both metals.

# S3–BIOPHYSICAL CHARACTERIZATION OF THE SCAFFOLDS

## S3.1–Circular dichroism spectra of TFD variants

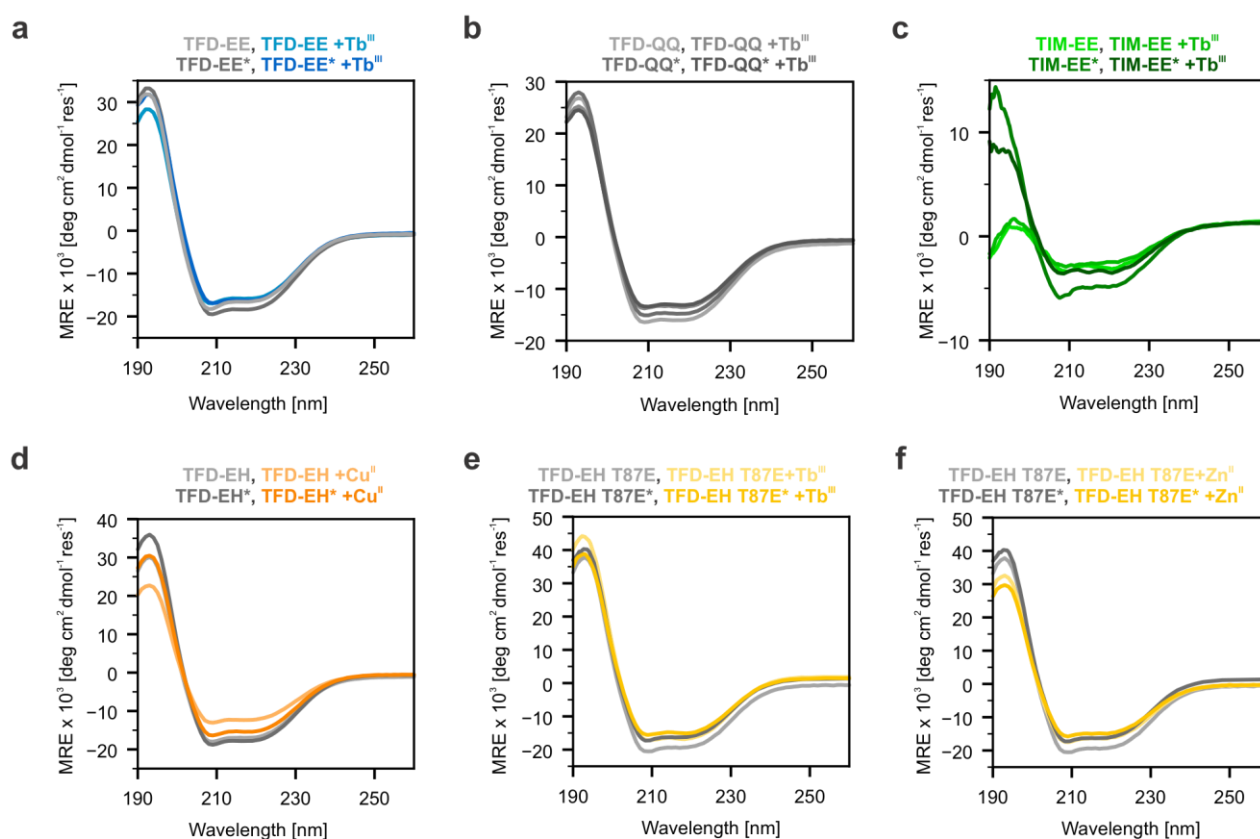

**Figure S2.** Circular dichroism spectra of TFD-EE, TFD-EH, and TFD-EH T87E.

**a**, TFD-EE (metal-free and with  $\text{Tb}^{\text{III}}$ ). When the metal-free TFD-EE is at room temperature, it exhibits a shifted signal minimum of 205 nm. In all other conditions, the minimum remains at 208–209 nm. **b**, TFD-QQ (metal-free and with  $\text{Tb}^{\text{III}}$ ). TFD-QQ displays the same spectral shape at both room temperature and 40 °C, regardless of metal binding or heating treatment. **c**, TIM-EE (metal-free and with  $\text{Tb}^{\text{III}}$ ). TIM-EE shows improved CD signal intensity after heating, which is further enhanced by metal binding. The most unfolded condition is observed at room temperature, and metal alone does not provide a clear stabilizing effect. **d**, TFD-EH (metal-free and with  $\text{Cu}^{\text{II}}$ ). TFD-EH retains the same overall spectral shape at both temperatures, with or without metal addition. **e,f**, TFD-EH T87E (metal-free and with  $\text{Tb}^{\text{III}}$  and  $\text{Zn}^{\text{II}}$ ). Similar to TFD-EH, this variant also maintains consistent spectral features at room temperature and 40 °C, regardless of metal binding.

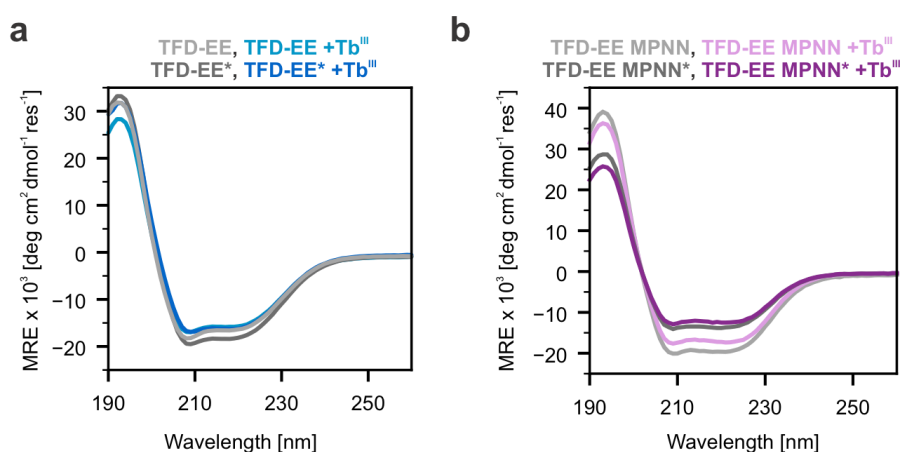

**Figure S3.** Circular dichroism spectra of the TFD-EE and TFD-EE MPNN.

**a**, TFD-EE (metal-free and with  $Tb^{III}$ ). When the metal-free TFD-EE is at room temperature, it exhibits a shifted signal minimum of 205 nm. In all other conditions, the minimum remains at 208–209 nm. **b**, TFD-EE MPNN (metal-free in gray and with  $Tb^{III}$  in purple). This variant displays a similar spectral shape at both room temperature and 40 °C, regardless of metal binding or heating treatment. The signal is decreased after heating treatment, but the protein still shows a conserved secondary structure.

### S3.2–SEC-SLS data of TFD variants

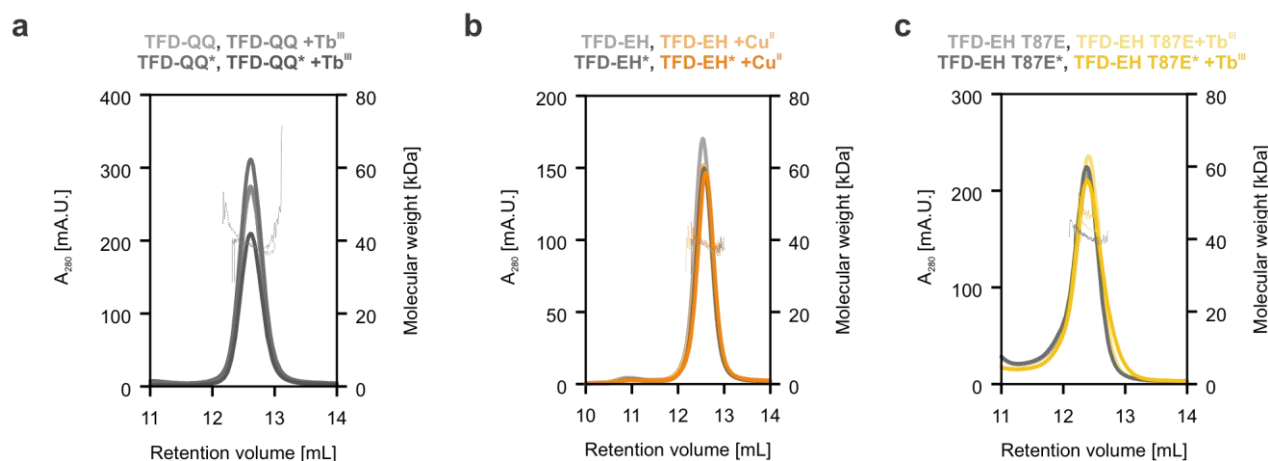

**Figure S4.** SEC-SLS profiles of TFD-QQ, TFD-EH, and TFD-EH T87E.

**a**, TFD-QQ (metal-free and with  $Tb^{III}$ ). A single peak is observed under all conditions and temperatures, indicating a stable dimeric species with no significantly higher-order oligomers. **b**, TFD-EH (metal-free and with  $Cu^{II}$ ). Like TFD-QQ, TFD-EH displays only one peak in every condition, consistent with a single dimeric species. **c**, TFD-EH T87E (metal-free and with  $Tb^{III}$ ). This variant also shows a single peak across all conditions and temperatures, again suggesting a stable dimer with negligible higher-order oligomer formation.

# S4-PROTEIN NUCLEAR MAGNETIC RESONANCE SPECTROSCOPY

## S4.1-Backbone Assignment of TFD-EE

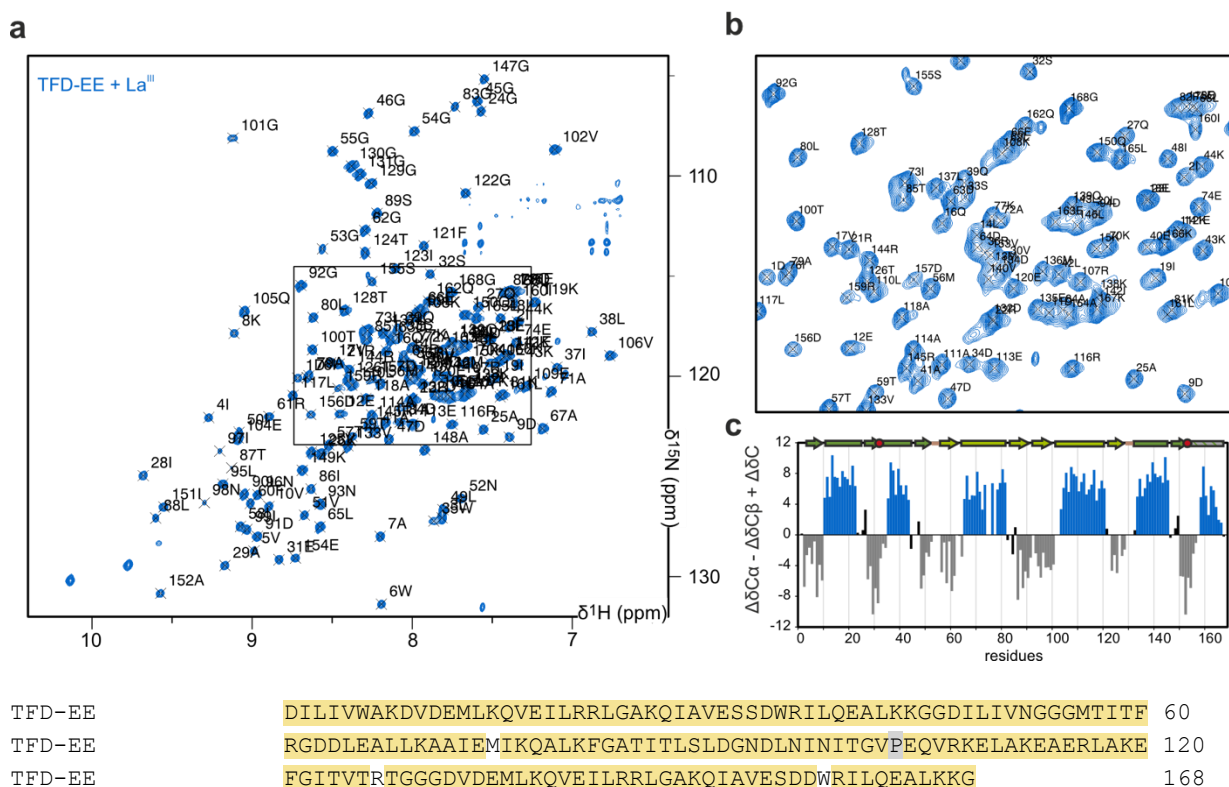

**Figure S5.** Backbone resonances assignment of La<sup>III</sup>-bound TFD-EE by NMR.

**a**, <sup>1</sup>H-<sup>15</sup>N HSQC spectrum of La<sup>III</sup>-bound triple-labeled TFD-EE with peak assignment labeled on the spectrum and a zoom on the central, overlapped region shown in **b**. **c**, The differences of chemical shifts of the backbone carbon atoms compared to their reference values in random coil regions indicate the α-helical propensity (positive values, in blue) and β-strand propensity (negative values, in gray) of the residue.

The spectra of La<sup>III</sup>-bound triple-labeled TFD-EE (protein concentration= 2 mM) were recorded at 800 MHz and 25 °C in NMR buffer (25 mM HEPES pH 7.0, 25 mM NaCl), using 12 scans and 200 increments. Backbone resonances were assigned using HNCACB, CBCA(CO)NH, HNCO, and HN(CA)CO spectra. Residues assigned are highlighted in yellow along the sequence, resulting in 98% coverage. The chemical shifts have been deposited in the BMRB (entry 53123).

## S4.2–Backbone Assignment of TFD-EH

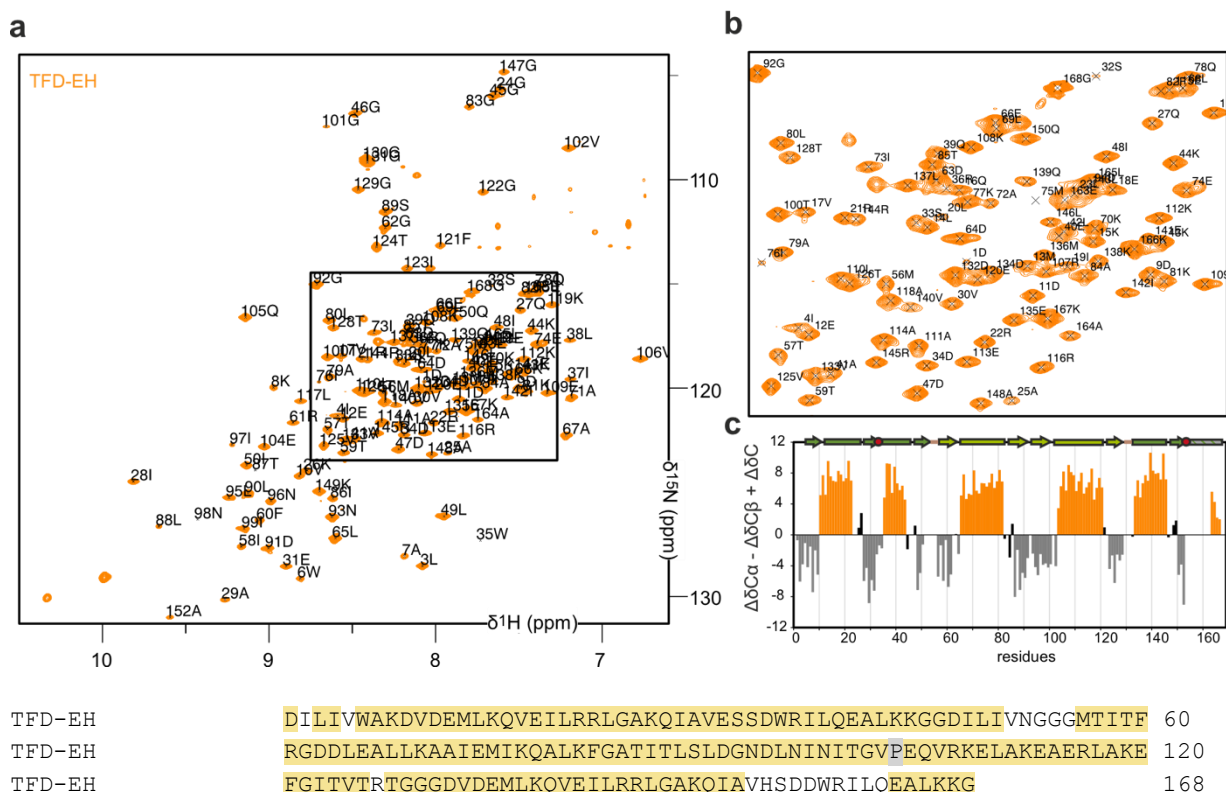

Assigned residues: 150/168

**Figure S6.** Backbone resonances assignment of metal-free TFD-EH by NMR.

**a**,  $^1\text{H}$ - $^{15}\text{N}$  HSQC spectrum of triple-labeled TFD-EH with peak assignment labeled on the spectrum and a zoom on the central, overlapped region shown in **b**. **c**, The differences of chemical shifts of the backbone carbon atoms compared to their reference values in random coil regions indicate the alpha helical propensity (positive values, in orange) and beta strand propensity (negative values, in gray) of the residue.

A spectrum of 1 mM triple-labeled TFD-EH was recorded at 800 MHz and 25 °C in NMR buffer (25 mM HEPES pH 7.0, 25 mM NaCl), using 12 scans and 200 increments. Backbone resonances were assigned using HNCACB and CBCA(CO)NH experiments, with HNCO, and HN(CA)CO spectra as validation. Residues assigned are highlighted in yellow along the sequence, resulting in 89% coverage. The chemical shifts have been deposited in the BMRB (entry 53124).

### S4.3–Metal titrations to TFD-QQ

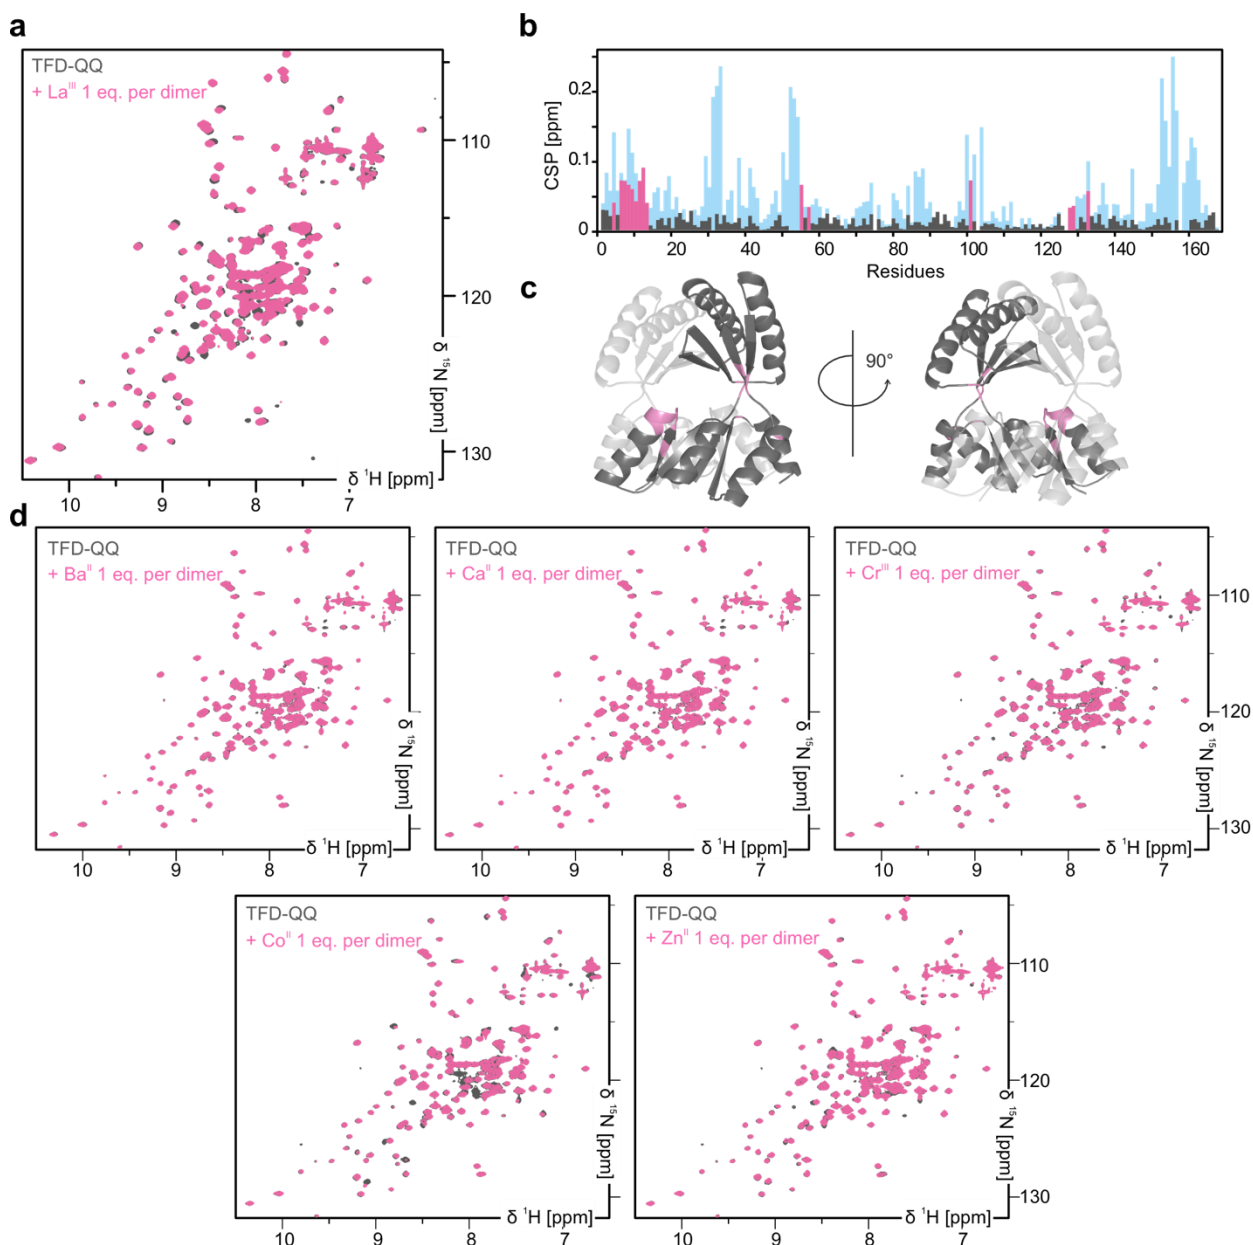

**Figure S7.** NMR characterization of TFD-QQ, the metal-binding “knockout” variant of TFD-EE, in the presence of different metal ions.

**a**,  $^1\text{H}$ - $^{15}\text{N}$  HSQC spectrum of TFD-QQ with  $\text{La}^{\text{III}}$  at a 1:1 ratio. TFD-QQ was designed to lack a functional metal-binding site, and the limited chemical shift changes suggest minimal interaction with  $\text{La}^{\text{III}}$ . **b**, Residue-specific chemical shift perturbations (CSPs) plotted in gray for TFD-QQ with vs. without  $\text{La}^{\text{III}}$ , highlighting in pink the highest values observed in residues far from the binding site. The CSP for TFD-EE with vs. without  $\text{La}^{\text{III}}$  is shown in blue for comparison to highlight the difference in scale for specific vs. nonspecific metal binding. **c**, The localized changes in TFD-QQ are consistent with nonspecific surface binding as shown in the cartoon representations of the protein. **d**, Additional  $^1\text{H}$ - $^{15}\text{N}$  HSQC spectra of TFD-QQ in the presence of  $\text{Ba}^{\text{II}}$ ,  $\text{Ca}^{\text{II}}$ ,  $\text{Co}^{\text{II}}$ ,  $\text{Cr}^{\text{III}}$ , and  $\text{Zn}^{\text{II}}$ , each showing similarly small CSPs. Notably, the disappearance of some shifts in the presence of cobalt was expected as a paramagnetic effect of the metal ion. Together, these results confirm that TFD-QQ does not bind metals specifically in the active site, although some surface interactions may occur.

## S4.4–Metal titrations to TFD-EH and TFD-EH T87E

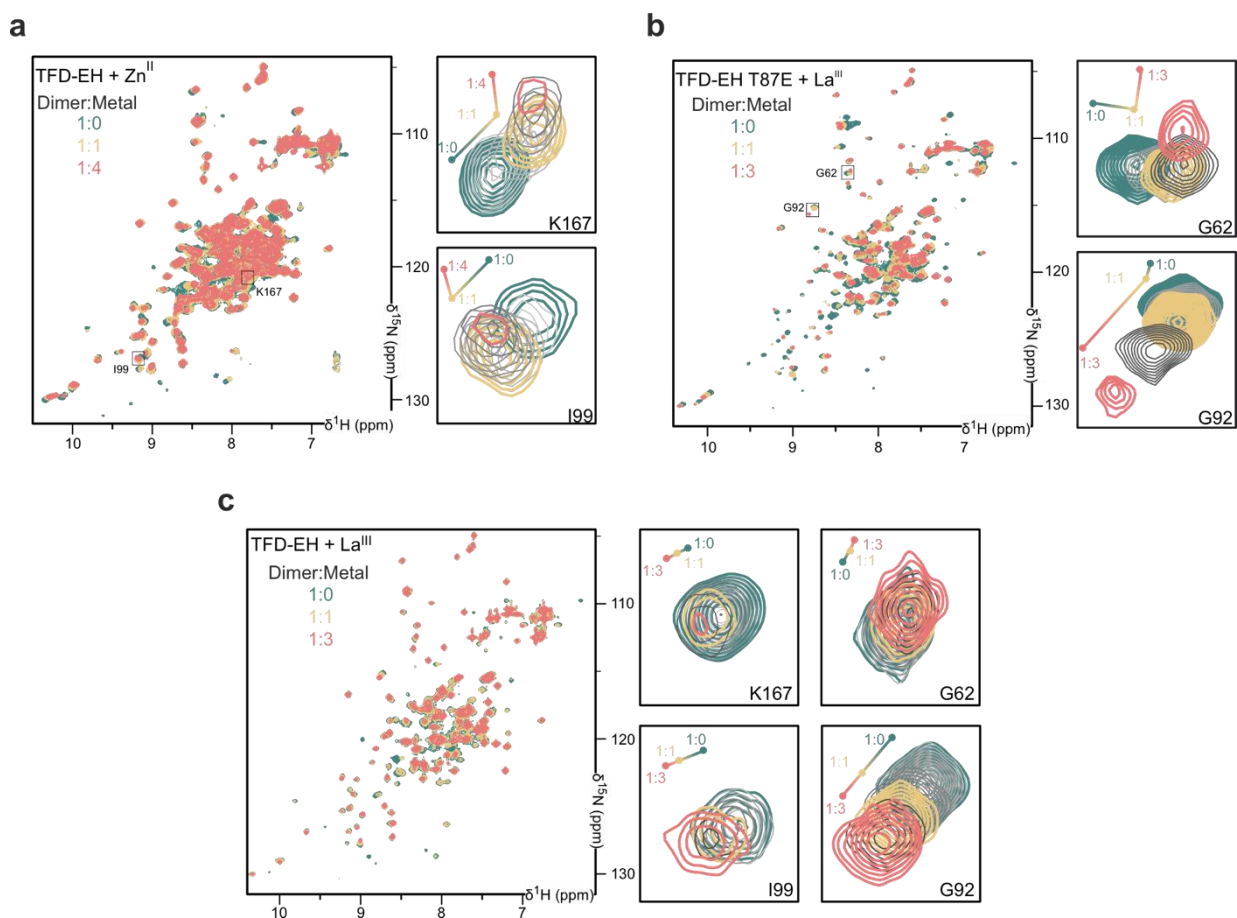

**Figure S8.** NMR titrations to observe metal binding to TFD-EH and TFD-EH T87E

**a**,  $^1\text{H}$ - $^{15}\text{N}$  HSQC spectra of TFD-EH titrated with  $\text{Zn}^{\text{II}}$  at increasing molar ratios of protein dimer to metal (0, 1, or 4 metal ions added per dimer). Residues K167 and I99 are highlighted, showing characteristic chemical shift changes in two directions, indicative of the binding of two metal ions per protein dimer. **b**,  $^1\text{H}$ - $^{15}\text{N}$  HSQC spectra of TFD-EH T87E with  $\text{La}^{\text{III}}$  at molar ratios 1:0, 1:1, and 1:3. G62 and G92 peaks are highlighted, showing the characteristic shifts that indicate binding of two metals to the protein dimer. **c**,  $^1\text{H}$ - $^{15}\text{N}$  HSQC spectra of TFD-EH titrated with  $\text{La}^{\text{III}}$  at molar ratios 1:0, 1:1, and 1:3. Highlighted residues (K167, I99, G62, and G92) are consistent with binding of a single  $\text{La}^{\text{III}}$  per dimer.

## S4.5–NMR characterization of TIM-EE

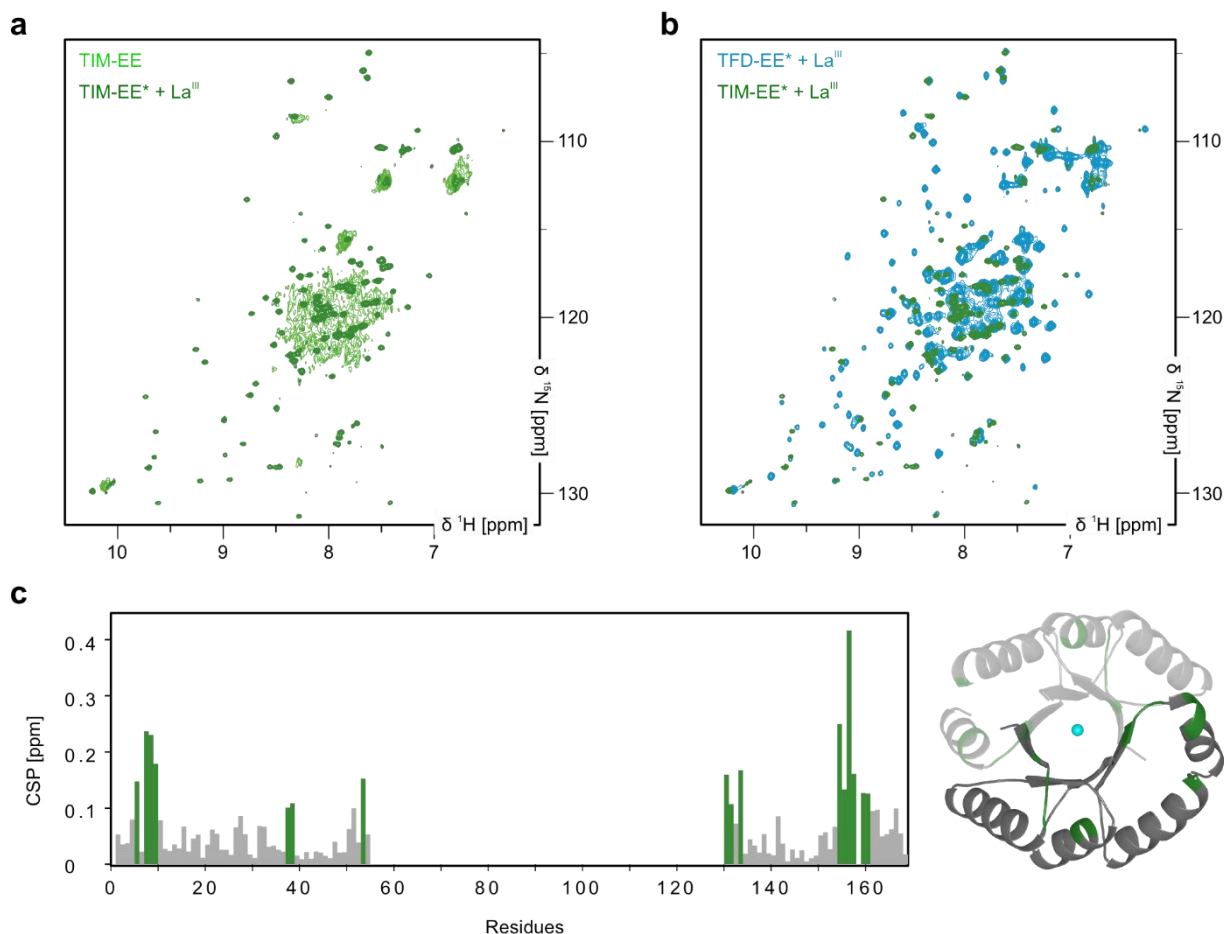

**Figure S9.** NMR characterization of TIM-EE, a truncated variant of TFD-EE in which the ferredoxin (FD) domain has been excised.

**a**,  $^1\text{H}$ - $^{15}\text{N}$  HSQC spectrum of TIM-EE in the absence (light green) and presence of  $\text{La}^{\text{III}}$  (dark green). **b**,  $^1\text{H}$ - $^{15}\text{N}$  HSQC spectra overlay of full-length TFD-EE (blue) and TIM-EE (green) after heat treatment and metal addition. **c**, Residue-specific chemical shift perturbations (CSPs) for TIM-EE +  $\text{La}^{\text{III}}$  compared to TFD-EE +  $\text{La}^{\text{III}}$ , with the missing FD region reflected in the sequence numbering. A cartoon representation of the TIM barrel is shown on the right, highlighting the most pronounced CSPs. Despite the removed FD domain, the HSQC patterns for TIM-EE and TFD-EE show a similar behavior consistent with lanthanide binding and heat treatment being essential to generate well-resolved peaks.



## S4.6–Conformational ensemble analysis based on NMR pseudo-contact shifts (PCS)

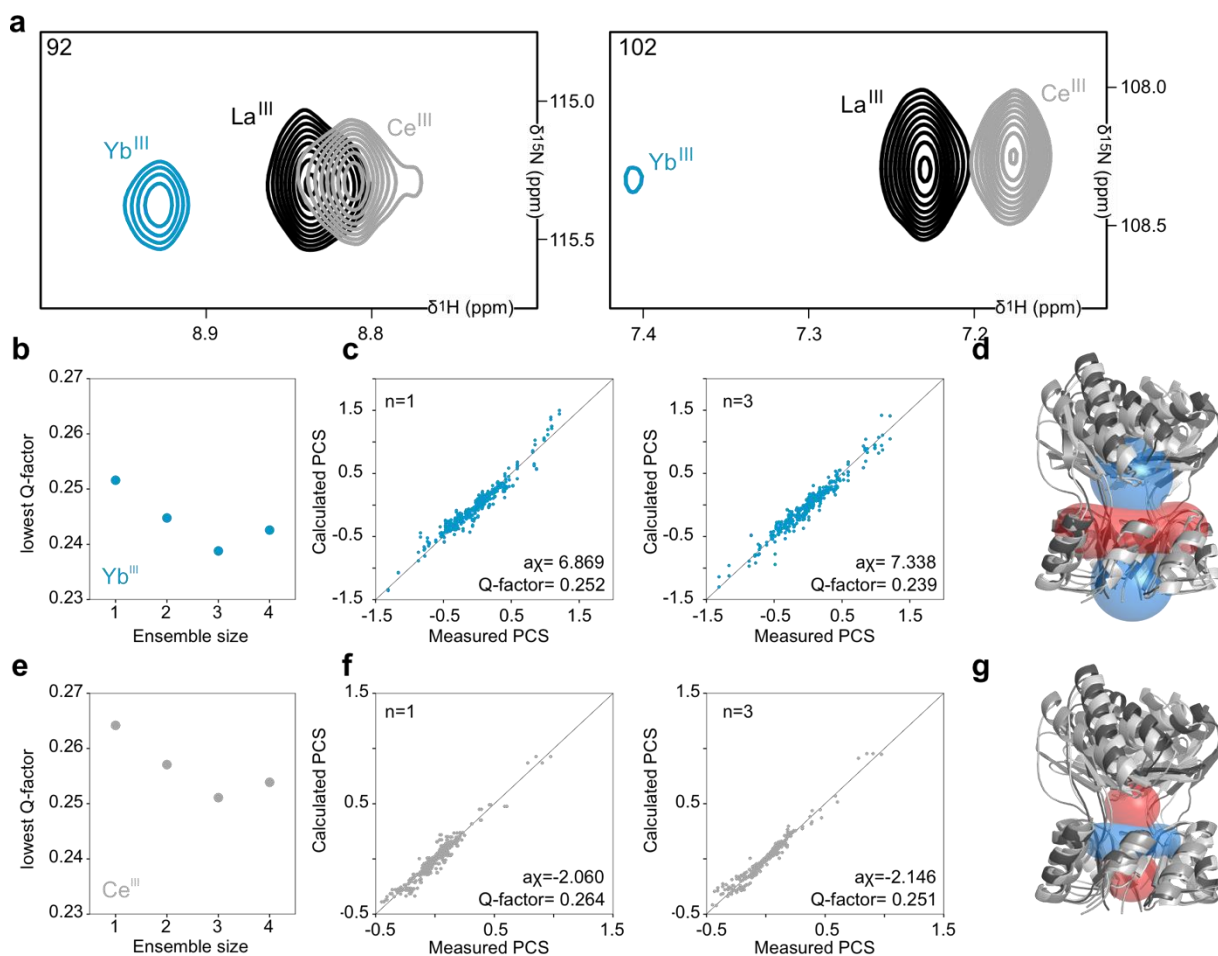

**Figure S10.** Ensemble analysis of PCS data from TFD-EE.

**a**, Extract of TFD-EE  $^1\text{H}$ - $^{15}\text{N}$  HSQC spectra for residues G92 and V102; showing the pseudo-contact shifts induced by the paramagnetic  $\text{Ce}^{\text{III}}$  and  $\text{Yb}^{\text{III}}$  compared to the diamagnetic  $\text{La}^{\text{III}}$ . **b**, Best Q-factor by ensemble size obtained for TFD-EE +  $\text{Yb}^{\text{III}}$ . **c**, Correlation between measured PCS with  $\text{Yb}^{\text{III}}$  and calculated from the model for the single best model (left) and the best ensemble (right). **d**, Visualization of the  $\text{Yb}^{\text{III}}$ -induced tensor of the best fitting ensemble with spheres indicating the 0.5ppm PCS cutoff point. **e**, Best Q-factor by ensemble size obtained for TFD-EE +  $\text{Ce}^{\text{III}}$ . **f**, Correlation between measured PCS with  $\text{Ce}^{\text{III}}$  and calculated from the model for the single best model (left) and the best ensemble (right). **g**, visualization of the  $\text{Ce}^{\text{III}}$ -induced tensor of the best fitting ensemble with spheres indicating the 0.5ppm PCS cutoff point.

# S5—MOLECULAR DYNAMICS SIMULATIONS

## S5.1—RMSD analysis

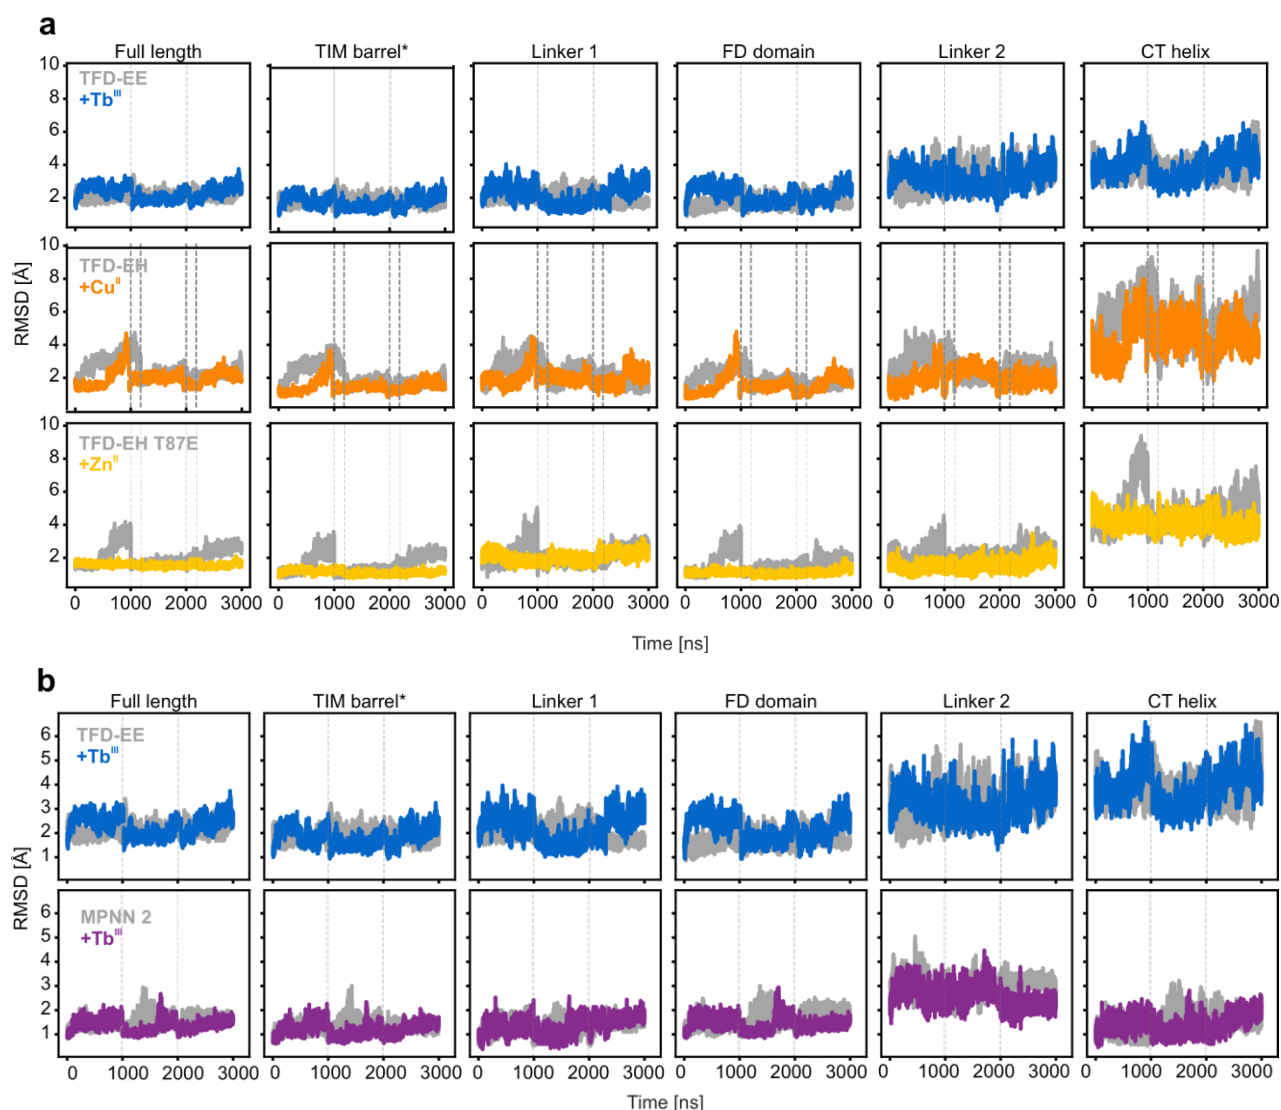

**Figure S11.** Time evolution of the root-mean-square deviations (RMSD) for all TFD variants.

RMSD plots of full-length proteins and of different regions in the protein defined as TIM barrel\* (residues: 1-52, 132-155 (without C-terminal helix), linker 1 (residues: 53-55), FD domain (residues 56-128), linker 2 (residues: 129-131), and the C-terminal (CT) helix (residues: 156-168) are shown. **a** The metal-free time-series plots are shown in gray for all simulations, while the metal-bound states are shown in blue (TFD-EE), orange (TFD-EH), and yellow (TFD-EH T87E). **b**, The TFD-EE MPNN metal-bound state RMSDs are shown in purple and compared to the original TFD-EE in blue.

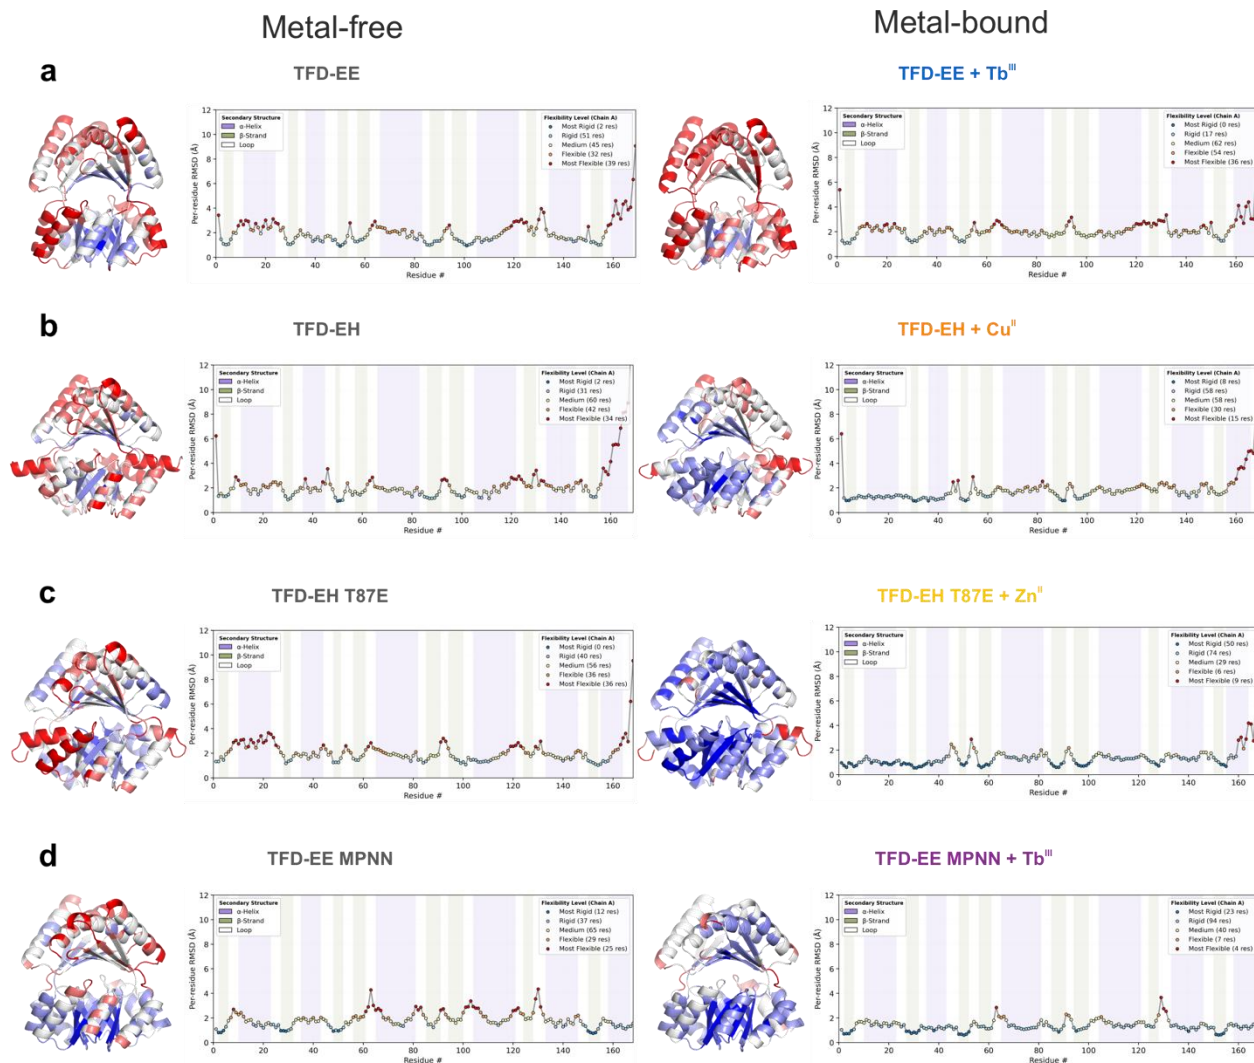

**Figure S12.** Per-residue RMSD calculation of all TFD variants.

Per-residue RMSD values were calculated using MDtraj [2] after superimposing the trajectory on the starting structure. Residues in the cartoon representations are color-coded on a blue-white-red scale, where blue represents rigid regions and red indicates flexible regions. The RMSD values were grouped into five levels: Level 1 (0.0-1.0 Å), Level 2 (1.0-1.5 Å), Level 3 (1.5-2.0 Å), Level 4 (2.0-2.5 Å), and Level 5 (>2.5 Å). The left side of the plot shows results for the metal-free variants, while the right side displays the corresponding metal-bound simulations. Panels a-d represent the metal-free and metal-bound comparisons for each TFD variant: TFD-EE (a), TFD-EH (b), TFD-EH T87E (c), and TFD-EE MPNN (d).

## S5.2–RMSF analysis

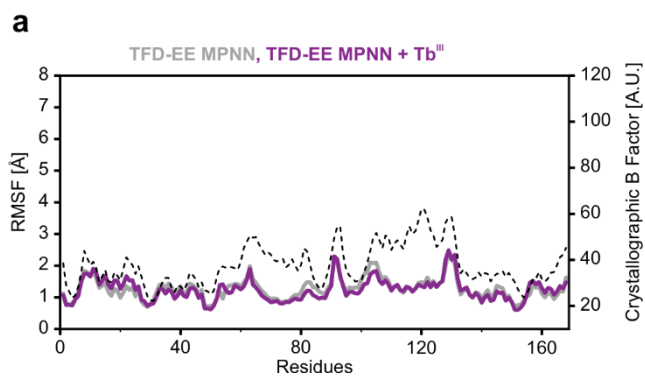

**Figure S13.** Root-mean-square fluctuation (RMSF) plots for TFD-EE MPNN.

RMSF of TFD-EE MPNN in the presence (purple) or absence (gray) of Tb<sup>III</sup>. The x-axis indicates the residue number, while the left y-axis shows the RMSF in Å. The black dotted line represents the crystallographic B-factor for reference plotted on the right y-axis.

### S5.3–Dihedral angles

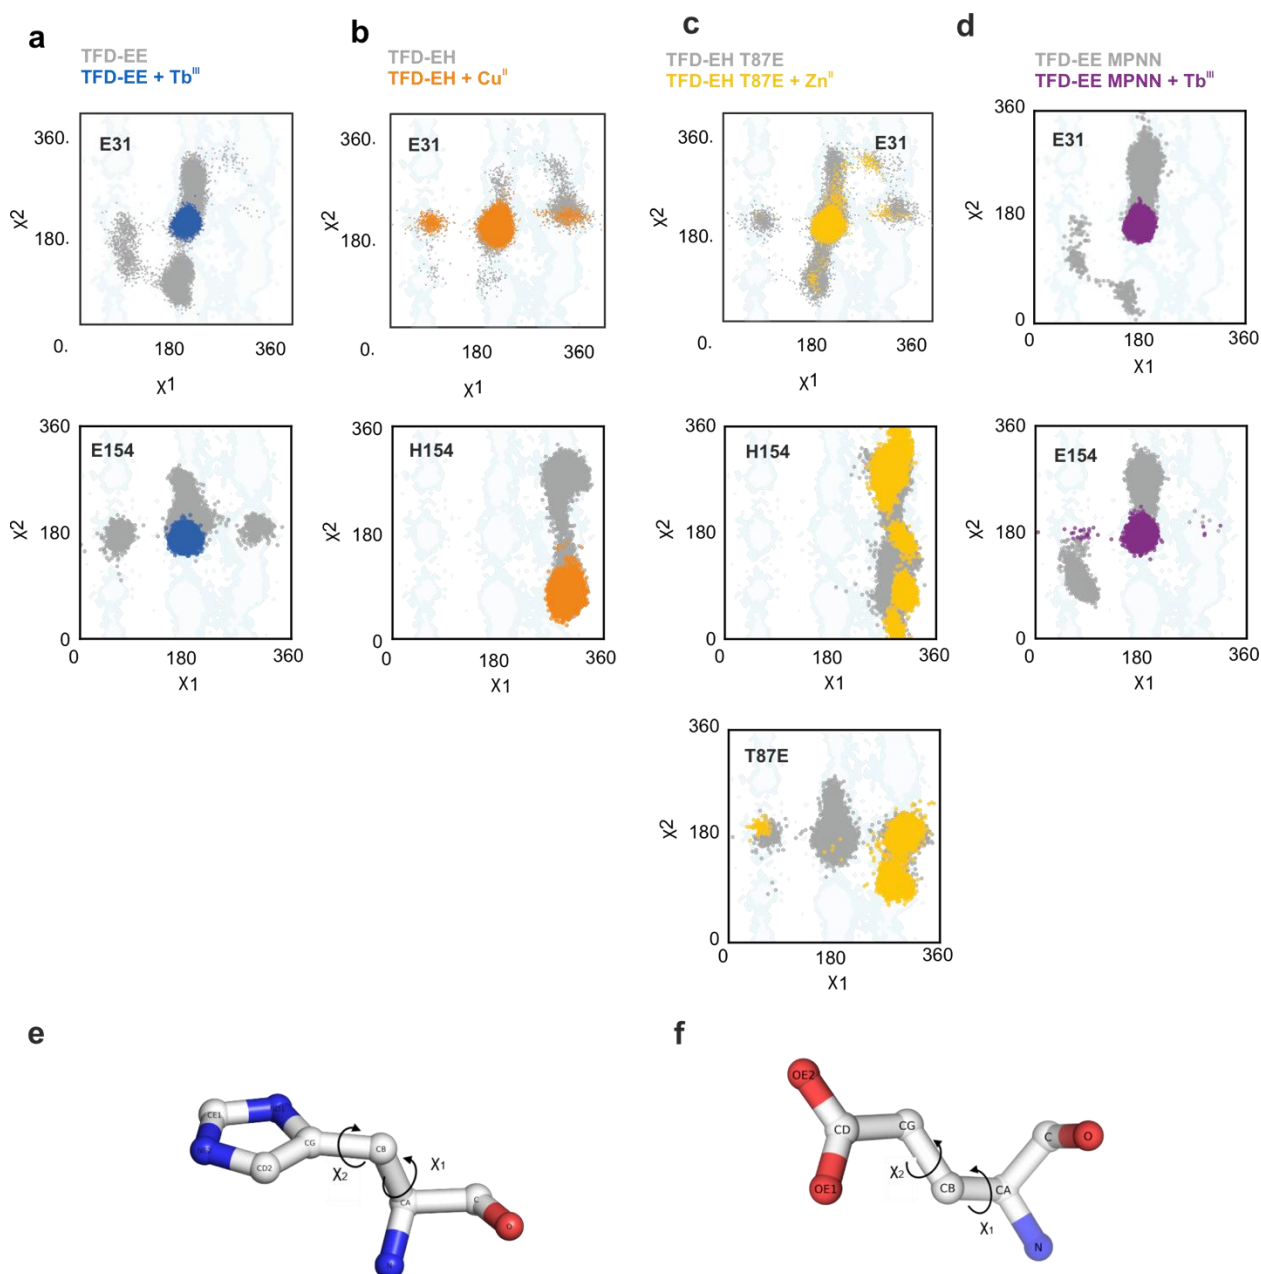

**Figure S14.** Side chain dihedral angle ( $\chi_1$ ,  $\chi_2$ ) distributions for key metal-coordinating residues in all TFD variants.

Janin plots [3-5] showing a comparison between metal-free (in gray) and metal-bound (colors) MD simulations and thus the influence of metal-binding on the side-chain flexibility of metal-coordinating residues. **a**, Dihedral angle distribution of residues E31 and E154 from TFD-EE (apo in gray, holo in blue). **b**, Dihedral angle distribution of residues E31 and H154 from TFD-EH (apo in gray, holo in orange). **c**, Dihedral angle distribution of residues E31, E87, and H154 from TFD-EH T87E (apo in gray, holo in yellow). **d**, Dihedral angle distribution of residues E31 and E154 from TFD-EE MPNN (apo in gray and holo in purple). **e**, Definition of the dihedral angle for any given glutamate and histidine (**f**).

## S5.4–Principal component analysis (PCA)

a

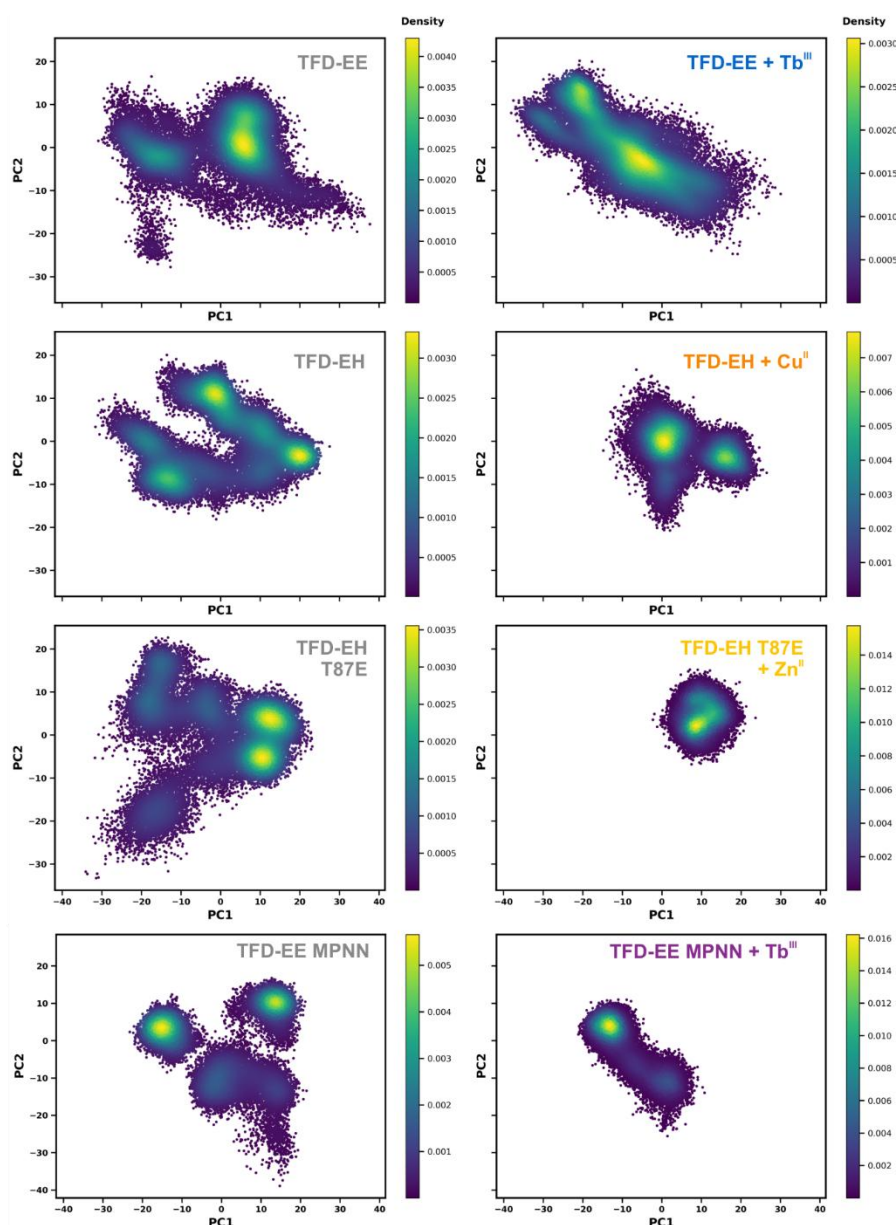

**Figure S15.** PCA density plots of all TFD variants.

2D density plots derived from principal component analysis (PCA) of molecular dynamics simulations for TFD variants TFD-EE, TFD-EH, TFD-EH T87E, and TFD-EE MPNN with metal-free and metal-bound simulations. Each panel represents the motion in PC1-PC2 space, with the color scale (purple to yellow) indicating increasing sampling density. The plots highlight the effect of metal binding and the difference in the conformational flexibility of each protein.



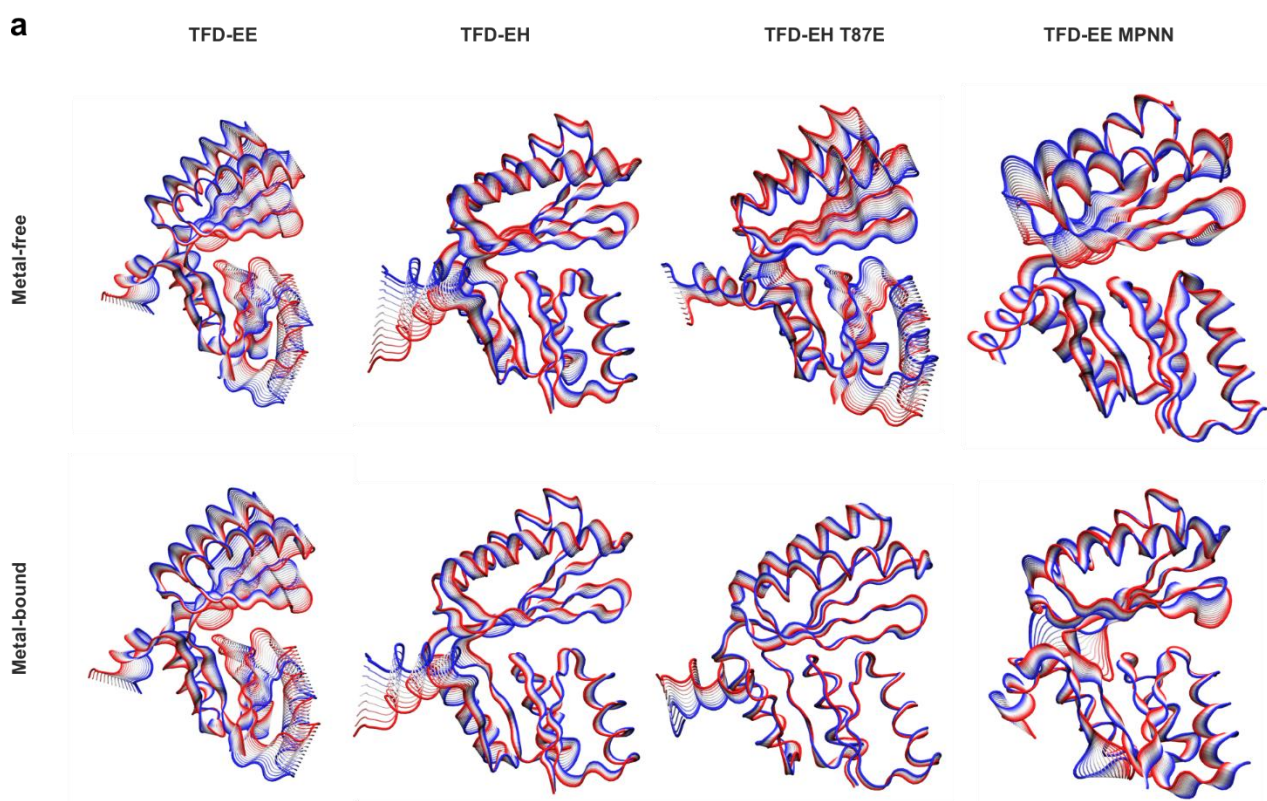

**Figure S16.** Representative pseudo-trajectories extracted from the principal component analysis of TFD variants.

Overlay of representative structures of TFD and MPNN variants from principal component analysis (PCA) in metal-free (top row) and metal-bound (bottom row) conditions. Each column shows one variant—TFD-EE, TFD-EH, TFD-EH T87E, and TFD-EE MPNN, color range from red (starting frame) to blue (end of frame) ribbon representations along the pseudo-trajectory defined by the first principal component (PC1). This comparison highlights how metal binding influences global domain movements and overall conformational flexibility across the different protein designs. While this figure presents static snapshots of the PCA, the corresponding motions can be viewed in **Supplementary Video S4** online.

Backbone C $\alpha$ -atoms were used to perform PCA calculations in the CPPTRAJ program in AmberTools [6]. Before computing PCA modes, the rotational/translational motions were removed by fitting the trajectory to an average structure. The coordinate covariance matrix and subsequent eigenvectors (100 PC modes) and eigenvalues (weight of each PC) were calculated by diagonalizing the covariance matrix. Then, the original trajectory coordinates were projected along PCs for visualization. The holo trajectory was similarly projected using eigenvectors of the apo form to compare the variance along the PCs in apo and holo simulations. To visualize the fluctuations of the PC modes, pseudo-trajectories were generated using eigenvectors from apo and holo simulations and the min-max values (pcmin and pcmax) of the PC1 and PC2 modes.

## S5.5–Interface energy analysis ( $\Delta G$ )

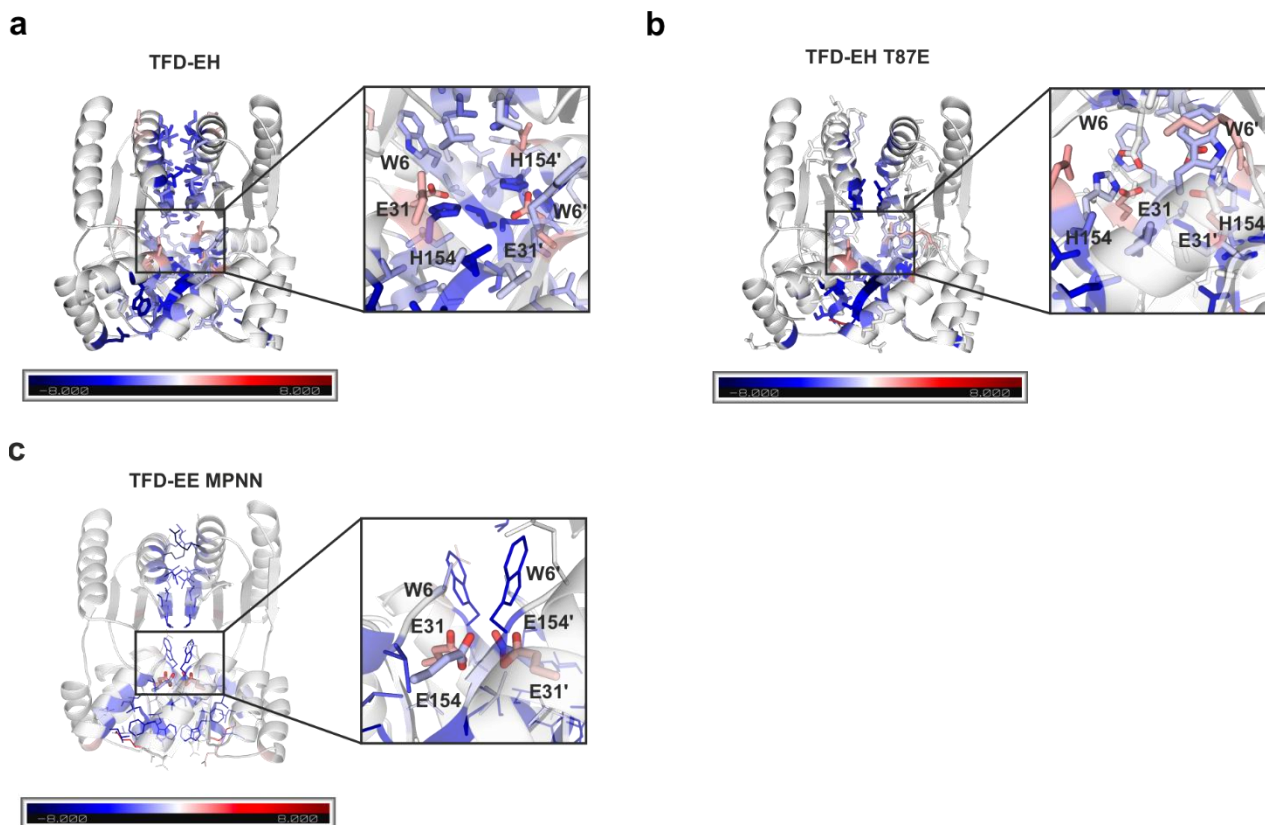

**Figure S17.** Analysis of the free energy contributions of dimer interface residues calculated from MD simulations.

TFD-EH (**a**), TFD-EH T87E (**b**), and TFD-EE MPNN (**c**) with their respective zoom-in views of the active site. The energy bar (blue to red) ranges from  $-8.000$  to  $+8.000$  A.U. The free energy of binding and contributions of each residue at the interface of the homodimers were calculated using molecular mechanics energies combined with the Poisson-Boltzmann surface area (MMPBSA) integrated in the Gromacs software (gmx\_MMPBSA) [7]. The interface residues were defined by setting the cutoff to residues within  $10 \text{ \AA}$ . The energy decomposition and contribution of each residue at the dimer interface were visualized in Pymol.



# S6–RADICAL DIOL CLEAVAGE OF (*R,R*)-HYDROBENZOIN

## S6.1–Reaction mechanism

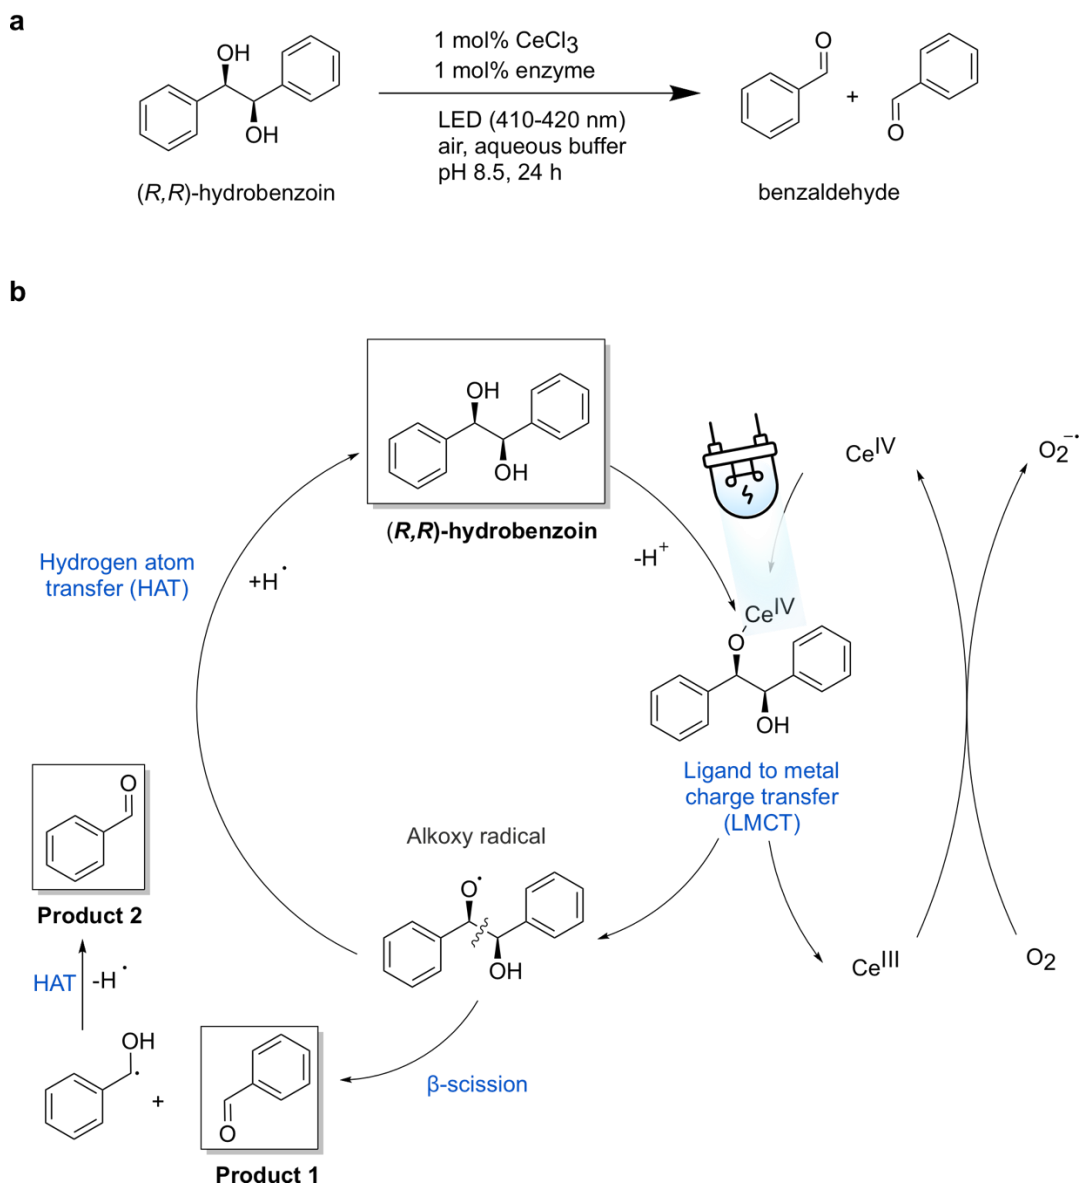

**Figure S18.** Photocatalytic radical cleavage of (*R,R*)-hydrobenzoin via cerium-bound enzyme catalysis.

**a**, Overall photoenzymatic reaction: (*R,R*)-hydrobenzoin undergoes radical C–C bond cleavage under visible light irradiation (410–420 nm) in the presence of 1 mol% CeCl<sub>3</sub> and 1 mol% TFD-EE in aqueous buffer, yielding two equivalents of benzaldehyde. **b**, Proposed mechanism: Coordination of (*R,R*)-hydrobenzoin to Ce<sup>IV</sup> followed by photoinduced ligand-to-metal charge transfer (LMCT) generates an alkoxy radical. β-scission of the C–C bond produces one equivalent of benzaldehyde (Product 1) and a radical intermediate that undergoes hydrogen atom transfer (HAT) to produce a second equivalent of benzaldehyde (Product 2). The Ce<sup>III</sup> species is reoxidized by O<sub>2</sub> completing the photocatalytic cycle.

# S7-PROTEIN INTERACTIONS ANALYSIS

## S7.1-Multiple Sequence Alignment (MSA) of the TFD-EE variants

CLUSTAL O(1.2.4) multiple sequence alignment

```

TFD-EE          DILIVWAKDVDEMLKQVEILRRLGAKQIAVESDWRILQEALKKGGDILIVNGGGMTITF 60
TFD-EE_MPNN     MTFIVWALNKDEMLKNIEALRKAGAKNIAVESGDFDILRAAIEAGVETIVVSGGGLTIVF 60
                  *                               *                               ***

TFD-EE          RGDDLEALLKAAIEMIKQALKFGATITLSLDGNDLNINITGVPEQVRKELAKEAERLAKE 120
TFD-EE_MPNN     TGADRAALPRRAKRILLDAALELGAVVTVALDGDALRVRLITGVPEQDLERLRALARELAEE 120

TFD-EE          FGITVTRTGGGDVDEMLKQVEILRRLGAKQIAVESDWRILQEALKKG 168
TFD-EE_MPNN     FGIEVEVRGGGTPERALREIQELRELGAKNIWVESANVDWLLKLLKLS 168
                  ***                               *
```

**Figure S19.** Multiple sequence alignment of TFD-EE and TFD-EE MPNN.

The alignment highlights nine fixed residues (\*), two metal-coordinating residues (○), and rationally designed surface mutations (in **bold**). For TFD-EE MPNN, the rational mutations are E11D, H73K, E105Q, E121F, and E141Q. Interface interactions are indicated by colored highlights: yellow for hydrophobic clusters, cyan for positively charged residues in salt bridges, red for negatively charged residues in salt bridges, and green for  $\pi$ - $\pi$  stacking. The total sequence length is 168 residues for both scaffolds. The MSA was performed using CLUSTAL O(1.2.4) online tool.

## S7.2–ProtInter Calculator

Table S–X. Summary from ProtInter Calculator for [TFD-EE, PDB: 6ZV9]. Intermolecular Interactions of Chain A and Chain B

**\*\*cationpi (3 total):\*\***

| Res1 | idRes1 | Ch1 | Res2 | idRes2 | Ch2 | Distance |
|------|--------|-----|------|--------|-----|----------|
| TRP  | 35     | A   | ARG  | 36     | A   | 5.79 Å   |
| LYS  | 70     | A   | PHE  | 121    | A   | 5.97 Å   |
| TRP  | 158    | A   | ARG  | 159    | A   | 5.81 Å   |

**\*\*hbond\_main\_side (11 total):\*\***

| Res1 | idRes1 | Ch1 | Res2 | idRes2 | Ch2 | Distance |
|------|--------|-----|------|--------|-----|----------|
| MET  | 13     | A   | LEU  | 14     | A   | 3.38 Å   |
| SER  | 32     | A   | SER  | 33     | A   | 3.02 Å   |
| SER  | 32     | A   | ASP  | 34     | A   | 2.94 Å   |
| SER  | 33     | A   | ASP  | 34     | A   | 3.49 Å   |
| MET  | 56     | A   | ARG  | 107    | A   | 3.60 Å   |
| MET  | 75     | A   | LEU  | 110    | A   | 3.74 Å   |
| MET  | 75     | A   | ALA  | 114    | A   | 3.76 Å   |
| ARG  | 107    | A   | GLY  | 130    | A   | 2.98 Å   |
| MET  | 136    | A   | LEU  | 137    | A   | 3.48 Å   |
| SER  | 155    | A   | ASP  | 156    | A   | 2.99 Å   |
| SER  | 155    | A   | ASP  | 157    | A   | 3.07 Å   |

**\*\*hydrophobic (152 total):\*\***

| Res1 | idRes1 | Ch1 | Res2 | idRes2 | Ch2 | Distance |
|------|--------|-----|------|--------|-----|----------|
| ILE  | 2      | A   | ILE  | 4      | A   | 4.22 Å   |
| ILE  | 2      | A   | ALA  | 29     | A   | 4.14 Å   |
| ILE  | 2      | A   | ILE  | 48     | A   | 4.56 Å   |
| LEU  | 3      | A   | LEU  | 20     | A   | 4.60 Å   |
| LEU  | 3      | A   | ALA  | 25     | A   | 4.81 Å   |
| ILE  | 4      | A   | ALA  | 29     | A   | 4.27 Å   |
| ILE  | 4      | A   | ILE  | 50     | A   | 4.64 Å   |
| VAL  | 5      | A   | ALA  | 7      | A   | 4.29 Å   |
| VAL  | 5      | A   | MET  | 13     | A   | 4.67 Å   |
| VAL  | 5      | A   | VAL  | 17     | A   | 4.83 Å   |
| VAL  | 5      | A   | LEU  | 20     | A   | 4.95 Å   |
| VAL  | 5      | A   | ILE  | 28     | A   | 4.27 Å   |
| VAL  | 5      | A   | VAL  | 30     | A   | 4.95 Å   |
| ALA  | 7      | A   | MET  | 13     | A   | 3.62 Å   |
| VAL  | 10     | A   | MET  | 13     | A   | 4.58 Å   |
| VAL  | 10     | A   | LEU  | 14     | A   | 4.18 Å   |
| VAL  | 10     | A   | ILE  | 37     | A   | 4.78 Å   |
| MET  | 13     | A   | LEU  | 14     | A   | 4.75 Å   |
| MET  | 13     | A   | VAL  | 17     | A   | 4.44 Å   |
| MET  | 13     | A   | VAL  | 30     | A   | 4.94 Å   |
| MET  | 13     | A   | ILE  | 37     | A   | 4.16 Å   |
| MET  | 13     | A   | ALA  | 41     | A   | 4.71 Å   |
| VAL  | 17     | A   | ILE  | 28     | A   | 4.76 Å   |
| VAL  | 17     | A   | VAL  | 30     | A   | 3.77 Å   |
| ILE  | 19     | A   | LEU  | 23     | A   | 4.49 Å   |
| LEU  | 20     | A   | LEU  | 23     | A   | 4.72 Å   |
| LEU  | 20     | A   | ALA  | 25     | A   | 4.12 Å   |
| LEU  | 20     | A   | ILE  | 28     | A   | 4.48 Å   |
| ALA  | 25     | A   | ILE  | 28     | A   | 3.75 Å   |
| ILE  | 28     | A   | VAL  | 30     | A   | 4.75 Å   |
| ALA  | 29     | A   | ILE  | 48     | A   | 3.72 Å   |
| ALA  | 29     | A   | ILE  | 50     | A   | 4.39 Å   |

|     |    |   |     |     |   |        |
|-----|----|---|-----|-----|---|--------|
| VAL | 30 | A | ILE | 37  | A | 4.19 Å |
| VAL | 30 | A | LEU | 38  | A | 4.59 Å |
| VAL | 30 | A | ALA | 41  | A | 3.85 Å |
| VAL | 30 | A | LEU | 49  | A | 4.72 Å |
| LEU | 38 | A | LEU | 49  | A | 4.81 Å |
| LEU | 38 | A | VAL | 51  | A | 4.47 Å |
| LEU | 38 | A | LEU | 143 | A | 4.71 Å |
| ALA | 41 | A | LEU | 49  | A | 3.90 Å |
| LEU | 42 | A | LEU | 49  | A | 4.70 Å |
| LEU | 42 | A | LEU | 143 | A | 4.96 Å |
| LEU | 42 | A | LEU | 146 | A | 3.68 Å |
| LEU | 42 | A | ALA | 148 | A | 4.76 Å |
| ILE | 48 | A | ILE | 50  | A | 4.25 Å |
| ILE | 48 | A | ALA | 152 | A | 4.47 Å |
| LEU | 49 | A | LEU | 143 | A | 4.35 Å |
| LEU | 49 | A | ALA | 148 | A | 4.74 Å |
| ILE | 50 | A | ALA | 152 | A | 4.36 Å |
| VAL | 51 | A | MET | 136 | A | 4.91 Å |
| VAL | 51 | A | VAL | 140 | A | 4.48 Å |
| VAL | 51 | A | LEU | 143 | A | 3.79 Å |
| VAL | 51 | A | ILE | 151 | A | 4.51 Å |
| VAL | 51 | A | VAL | 153 | A | 4.55 Å |
| MET | 56 | A | ILE | 58  | A | 4.47 Å |
| MET | 56 | A | ILE | 99  | A | 4.89 Å |
| MET | 56 | A | LEU | 110 | A | 4.07 Å |
| MET | 56 | A | ALA | 111 | A | 3.87 Å |
| ILE | 58 | A | PHE | 60  | A | 4.74 Å |
| ILE | 58 | A | MET | 75  | A | 4.96 Å |
| ILE | 58 | A | ILE | 97  | A | 4.46 Å |
| ILE | 58 | A | ILE | 99  | A | 4.65 Å |
| ILE | 58 | A | ALA | 111 | A | 4.58 Å |
| ILE | 58 | A | ALA | 114 | A | 4.73 Å |
| ILE | 58 | A | VAL | 125 | A | 4.80 Å |
| PHE | 60 | A | LEU | 68  | A | 5.00 Å |
| PHE | 60 | A | ALA | 71  | A | 4.51 Å |
| PHE | 60 | A | ALA | 72  | A | 4.73 Å |
| PHE | 60 | A | MET | 75  | A | 4.66 Å |
| PHE | 60 | A | LEU | 95  | A | 4.53 Å |
| PHE | 60 | A | ILE | 97  | A | 4.99 Å |
| PHE | 60 | A | ALA | 114 | A | 4.29 Å |
| PHE | 60 | A | LEU | 117 | A | 4.63 Å |
| PHE | 60 | A | ALA | 118 | A | 4.44 Å |
| PHE | 60 | A | ILE | 123 | A | 4.91 Å |
| PHE | 60 | A | VAL | 125 | A | 4.78 Å |
| LEU | 65 | A | LEU | 68  | A | 4.72 Å |
| LEU | 65 | A | LEU | 69  | A | 4.35 Å |
| LEU | 65 | A | LEU | 90  | A | 4.93 Å |
| ALA | 67 | A | PHE | 121 | A | 4.46 Å |
| ALA | 67 | A | ILE | 123 | A | 4.05 Å |
| LEU | 68 | A | LEU | 90  | A | 4.81 Å |
| LEU | 68 | A | LEU | 95  | A | 4.38 Å |
| LEU | 68 | A | ILE | 123 | A | 4.79 Å |
| LEU | 69 | A | ILE | 73  | A | 4.71 Å |
| LEU | 69 | A | LEU | 95  | A | 4.93 Å |
| ALA | 71 | A | LEU | 117 | A | 4.41 Å |
| ALA | 71 | A | PHE | 121 | A | 4.69 Å |
| ALA | 71 | A | ILE | 123 | A | 4.89 Å |
| ALA | 72 | A | ILE | 76  | A | 4.63 Å |
| ALA | 72 | A | LEU | 88  | A | 4.76 Å |
| ALA | 72 | A | LEU | 95  | A | 4.41 Å |
| ALA | 72 | A | ILE | 97  | A | 4.65 Å |

|     |     |   |     |     |   |        |
|-----|-----|---|-----|-----|---|--------|
| MET | 75  | A | ILE | 97  | A | 4.30 Å |
| MET | 75  | A | ILE | 99  | A | 3.77 Å |
| MET | 75  | A | LEU | 110 | A | 4.23 Å |
| MET | 75  | A | ALA | 114 | A | 4.78 Å |
| MET | 75  | A | LEU | 117 | A | 4.56 Å |
| ILE | 76  | A | LEU | 80  | A | 4.94 Å |
| ILE | 76  | A | ILE | 86  | A | 4.94 Å |
| ILE | 76  | A | LEU | 88  | A | 4.86 Å |
| ALA | 79  | A | ALA | 84  | A | 3.96 Å |
| ALA | 79  | A | ILE | 86  | A | 3.79 Å |
| ALA | 79  | A | ILE | 99  | A | 4.87 Å |
| ALA | 79  | A | LEU | 110 | A | 4.91 Å |
| LEU | 80  | A | ILE | 86  | A | 4.54 Å |
| PHE | 82  | A | VAL | 102 | A | 4.08 Å |
| PHE | 82  | A | VAL | 106 | A | 4.87 Å |
| PHE | 82  | A | LEU | 110 | A | 4.57 Å |
| ALA | 84  | A | ILE | 86  | A | 4.45 Å |
| ALA | 84  | A | ILE | 99  | A | 3.86 Å |
| ALA | 84  | A | VAL | 102 | A | 4.71 Å |
| ILE | 86  | A | LEU | 88  | A | 4.25 Å |
| ILE | 86  | A | ILE | 97  | A | 4.90 Å |
| ILE | 86  | A | ILE | 99  | A | 4.67 Å |
| LEU | 88  | A | LEU | 95  | A | 4.78 Å |
| LEU | 88  | A | ILE | 97  | A | 4.95 Å |
| LEU | 90  | A | LEU | 95  | A | 4.43 Å |
| LEU | 95  | A | ILE | 97  | A | 4.64 Å |
| ILE | 97  | A | ILE | 99  | A | 4.09 Å |
| ILE | 99  | A | VAL | 102 | A | 3.94 Å |
| ILE | 99  | A | LEU | 110 | A | 4.97 Å |
| VAL | 102 | A | PRO | 103 | A | 4.87 Å |
| VAL | 102 | A | VAL | 106 | A | 3.99 Å |
| VAL | 102 | A | LEU | 110 | A | 4.57 Å |
| PRO | 103 | A | VAL | 106 | A | 5.00 Å |
| VAL | 106 | A | LEU | 110 | A | 4.25 Å |
| ALA | 114 | A | VAL | 125 | A | 4.11 Å |
| LEU | 117 | A | PHE | 121 | A | 4.49 Å |
| ALA | 118 | A | ILE | 123 | A | 4.19 Å |
| ALA | 118 | A | VAL | 125 | A | 3.78 Å |
| PHE | 121 | A | ILE | 123 | A | 4.27 Å |
| VAL | 133 | A | MET | 136 | A | 4.44 Å |
| VAL | 133 | A | LEU | 137 | A | 4.19 Å |
| VAL | 133 | A | ILE | 160 | A | 4.62 Å |
| MET | 136 | A | LEU | 137 | A | 4.84 Å |
| MET | 136 | A | VAL | 140 | A | 4.94 Å |
| MET | 136 | A | VAL | 153 | A | 4.21 Å |
| MET | 136 | A | ILE | 160 | A | 4.77 Å |
| MET | 136 | A | ALA | 164 | A | 4.53 Å |
| LEU | 137 | A | ALA | 164 | A | 4.47 Å |
| VAL | 140 | A | ILE | 151 | A | 4.69 Å |
| VAL | 140 | A | VAL | 153 | A | 3.73 Å |
| ILE | 142 | A | LEU | 146 | A | 4.53 Å |
| LEU | 143 | A | LEU | 146 | A | 4.88 Å |
| LEU | 143 | A | ALA | 148 | A | 4.22 Å |
| LEU | 143 | A | ILE | 151 | A | 4.57 Å |
| ALA | 148 | A | ILE | 151 | A | 3.79 Å |
| ILE | 151 | A | VAL | 153 | A | 4.94 Å |
| VAL | 153 | A | ILE | 160 | A | 4.78 Å |
| VAL | 153 | A | LEU | 161 | A | 4.26 Å |
| VAL | 153 | A | ALA | 164 | A | 4.35 Å |

\*\*ionic (20 total):\*\*

| Res1 | idRes1 | Ch1 | Res2 | idRes2 | Ch2 | Distance |
|------|--------|-----|------|--------|-----|----------|
| LYS  | 8      | A   | ASP  | 9      | A   | 5.91 Å   |
| GLU  | 12     | A   | LYS  | 15     | A   | 3.78 Å   |
| GLU  | 18     | A   | ARG  | 22     | A   | 5.65 Å   |
| GLU  | 18     | A   | LYS  | 44     | A   | 5.30 Å   |
| ARG  | 21     | A   | ASP  | 47     | A   | 5.51 Å   |
| ASP  | 34     | A   | ARG  | 36     | A   | 2.96 Å   |
| GLU  | 40     | A   | LYS  | 43     | A   | 2.61 Å   |
| ARG  | 61     | A   | ASP  | 94     | A   | 2.49 Å   |
| GLU  | 66     | A   | LYS  | 70     | A   | 5.38 Å   |
| GLU  | 74     | A   | LYS  | 77     | A   | 2.91 Å   |
| GLU  | 104    | A   | ARG  | 107    | A   | 5.86 Å   |
| GLU  | 104    | A   | LYS  | 108    | A   | 2.67 Å   |
| GLU  | 113    | A   | ARG  | 116    | A   | 3.23 Å   |
| ARG  | 116    | A   | GLU  | 120    | A   | 4.65 Å   |
| GLU  | 135    | A   | LYS  | 138    | A   | 4.19 Å   |
| GLU  | 141    | A   | ARG  | 144    | A   | 5.89 Å   |
| GLU  | 141    | A   | ARG  | 145    | A   | 2.88 Å   |
| GLU  | 141    | A   | LYS  | 167    | A   | 5.81 Å   |
| ASP  | 157    | A   | ARG  | 159    | A   | 4.26 Å   |
| GLU  | 163    | A   | LYS  | 166    | A   | 2.57 Å   |

\*\*hbond\_side\_side (1 total):\*\*

| Res1 | idRes1 | Ch1 | Res2 | idRes2 | Ch2 | Distance |
|------|--------|-----|------|--------|-----|----------|
| MET  | 56     | A   | ARG  | 127    | A   | 3.37 Å   |

Table S–XI. Summary from ProtInter Calculator for [TFD-EE, PDB: 6ZV9].  
Intermolecular Interface Interactions Between Chain A and Chain B

**\*\*cationpi (2 total):\*\***

| Res1 | idRes1 | Ch1 | Res2 | idRes2 | Ch2 | Distance |
|------|--------|-----|------|--------|-----|----------|
| LYS  | 15     | A   | TRP  | 158    | B   | 5.33 Å   |
| TRP  | 158    | A   | LYS  | 15     | B   | 5.34 Å   |

**\*\*hydrophobic (41 total):\*\***

| Res1 | idRes1 | Ch1 | Res2 | idRes2 | Ch2 | Distance |
|------|--------|-----|------|--------|-----|----------|
| ILE  | 2      | A   | ALA  | 152    | B   | 3.72 Å   |
| LEU  | 3      | A   | VAL  | 153    | B   | 4.87 Å   |
| LEU  | 3      | A   | LEU  | 161    | B   | 4.50 Å   |
| LEU  | 3      | A   | ALA  | 164    | B   | 4.16 Å   |
| LEU  | 3      | A   | LEU  | 165    | B   | 4.95 Å   |
| ILE  | 4      | A   | ALA  | 152    | B   | 4.18 Å   |
| VAL  | 5      | A   | LEU  | 161    | B   | 4.75 Å   |
| ILE  | 19     | A   | TRP  | 158    | B   | 4.84 Å   |
| LEU  | 20     | A   | TRP  | 158    | B   | 4.46 Å   |
| LEU  | 20     | A   | LEU  | 161    | B   | 4.82 Å   |
| LEU  | 23     | A   | TRP  | 158    | B   | 4.32 Å   |
| LEU  | 23     | A   | LEU  | 165    | B   | 4.08 Å   |
| ALA  | 25     | A   | LEU  | 165    | B   | 4.93 Å   |
| ILE  | 48     | A   | ILE  | 2      | B   | 4.61 Å   |
| ILE  | 50     | A   | ILE  | 4      | B   | 4.64 Å   |
| LEU  | 69     | A   | LEU  | 80     | B   | 3.82 Å   |
| ILE  | 73     | A   | ILE  | 73     | B   | 4.72 Å   |
| ILE  | 76     | A   | ILE  | 76     | B   | 4.38 Å   |
| LEU  | 80     | A   | LEU  | 69     | B   | 3.81 Å   |
| LEU  | 80     | A   | LEU  | 88     | B   | 4.51 Å   |
| LEU  | 80     | A   | LEU  | 90     | B   | 4.51 Å   |
| LEU  | 80     | A   | LEU  | 95     | B   | 4.15 Å   |
| LEU  | 88     | A   | ILE  | 76     | B   | 4.94 Å   |
| LEU  | 88     | A   | LEU  | 80     | B   | 4.50 Å   |
| LEU  | 88     | A   | ILE  | 86     | B   | 4.54 Å   |
| LEU  | 88     | A   | LEU  | 88     | B   | 4.77 Å   |
| LEU  | 90     | A   | LEU  | 80     | B   | 4.48 Å   |
| LEU  | 95     | A   | LEU  | 80     | B   | 4.11 Å   |
| ALA  | 152    | A   | ILE  | 2      | B   | 3.71 Å   |
| ALA  | 152    | A   | ILE  | 4      | B   | 4.18 Å   |
| VAL  | 153    | A   | LEU  | 3      | B   | 4.89 Å   |
| TRP  | 158    | A   | ILE  | 19     | B   | 4.83 Å   |
| TRP  | 158    | A   | LEU  | 20     | B   | 4.44 Å   |
| TRP  | 158    | A   | LEU  | 23     | B   | 4.31 Å   |
| LEU  | 161    | A   | LEU  | 3      | B   | 4.50 Å   |
| LEU  | 161    | A   | VAL  | 5      | B   | 4.74 Å   |
| LEU  | 161    | A   | LEU  | 20     | B   | 4.83 Å   |
| ALA  | 164    | A   | LEU  | 3      | B   | 4.17 Å   |
| LEU  | 165    | A   | LEU  | 3      | B   | 4.95 Å   |
| LEU  | 165    | A   | LEU  | 23     | B   | 4.10 Å   |
| LEU  | 165    | A   | ALA  | 25     | B   | 4.93 Å   |

**\*\*ionic (3 total):\*\***

| Res1 | idRes1 | Ch1 | Res2 | idRes2 | Ch2 | Distance |
|------|--------|-----|------|--------|-----|----------|
| ASP  | 1      | A   | ARG  | 144    | B   | 4.61 Å   |
| LYS  | 77     | A   | GLU  | 66     | B   | 5.98 Å   |
| ARG  | 144    | A   | ASP  | 1      | B   | 4.64 Å   |

Table S–XII. Summary from ProtInter Calculator for [TFD-EE MPNN, PDB: 9QUP].  
Intermolecular Interactions of Chain A and Chain B

**\*\*cationpi (3 total):\*\***

| Res1 | idRes1 | Ch1 | Res2 | idRes2 | Ch2 | Distance |
|------|--------|-----|------|--------|-----|----------|
| PHE  | 35     | A   | ARG  | 135    | A   | 5.95 Å   |
| ARG  | 70     | A   | PHE  | 121    | A   | 5.23 Å   |
| ARG  | 74     | A   | PHE  | 121    | A   | 5.45 Å   |

**\*\*hbond\_main\_side (10 total):\*\***

| Res1 | idRes1 | Ch1 | Res2 | idRes2 | Ch2 | Distance |
|------|--------|-----|------|--------|-----|----------|
| ALA  | 7      | A   | SER  | 32     | A   | 2.82 Å   |
| LEU  | 8      | A   | ARG  | 96     | A   | 3.36 Å   |
| MET  | 13     | A   | LEU  | 14     | A   | 3.46 Å   |
| SER  | 32     | A   | GLY  | 33     | A   | 3.13 Å   |
| SER  | 32     | A   | ASP  | 34     | A   | 3.13 Å   |
| ARG  | 65     | A   | GLY  | 92     | A   | 3.21 Å   |
| SER  | 155    | A   | ALA  | 156    | A   | 3.12 Å   |
| SER  | 155    | A   | ASN  | 157    | A   | 2.91 Å   |
| LEU  | 164    | A   | SER  | 168    | A   | 3.18 Å   |
| LEU  | 165    | A   | SER  | 168    | A   | 2.72 Å   |

**\*\*hydrophobic (171 total):\*\***

| Res1 | idRes1 | Ch1 | Res2 | idRes2 | Ch2 | Distance |
|------|--------|-----|------|--------|-----|----------|
| MET  | 1      | A   | PHE  | 3      | A   | 5.00 Å   |
| PHE  | 3      | A   | LEU  | 20     | A   | 4.49 Å   |
| PHE  | 3      | A   | ALA  | 25     | A   | 4.72 Å   |
| ILE  | 4      | A   | ALA  | 29     | A   | 4.48 Å   |
| ILE  | 4      | A   | VAL  | 50     | A   | 4.72 Å   |
| ILE  | 4      | A   | TRP  | 152    | A   | 4.50 Å   |
| VAL  | 5      | A   | ALA  | 7      | A   | 4.65 Å   |
| VAL  | 5      | A   | MET  | 13     | A   | 4.67 Å   |
| VAL  | 5      | A   | ILE  | 17     | A   | 4.65 Å   |
| VAL  | 5      | A   | LEU  | 20     | A   | 4.88 Å   |
| VAL  | 5      | A   | ILE  | 28     | A   | 4.73 Å   |
| VAL  | 5      | A   | VAL  | 30     | A   | 4.58 Å   |
| TRP  | 6      | A   | LEU  | 8      | A   | 4.78 Å   |
| ALA  | 7      | A   | MET  | 13     | A   | 3.65 Å   |
| ALA  | 7      | A   | VAL  | 30     | A   | 4.85 Å   |
| ALA  | 7      | A   | ILE  | 37     | A   | 4.22 Å   |
| LEU  | 8      | A   | ILE  | 37     | A   | 4.95 Å   |
| MET  | 13     | A   | LEU  | 14     | A   | 4.71 Å   |
| MET  | 13     | A   | ILE  | 17     | A   | 4.81 Å   |
| MET  | 13     | A   | VAL  | 30     | A   | 4.48 Å   |
| MET  | 13     | A   | ILE  | 37     | A   | 4.41 Å   |
| MET  | 13     | A   | ALA  | 40     | A   | 3.87 Å   |
| MET  | 13     | A   | ALA  | 41     | A   | 4.86 Å   |
| LEU  | 14     | A   | ILE  | 17     | A   | 4.98 Å   |
| LEU  | 14     | A   | ALA  | 40     | A   | 4.91 Å   |
| LEU  | 14     | A   | ALA  | 44     | A   | 3.73 Å   |
| ILE  | 17     | A   | ILE  | 28     | A   | 4.44 Å   |
| ILE  | 17     | A   | VAL  | 30     | A   | 3.70 Å   |
| ILE  | 17     | A   | ALA  | 44     | A   | 3.91 Å   |
| ILE  | 17     | A   | VAL  | 46     | A   | 4.69 Å   |
| LEU  | 20     | A   | ALA  | 25     | A   | 4.07 Å   |
| LEU  | 20     | A   | ILE  | 28     | A   | 4.37 Å   |
| ALA  | 25     | A   | ILE  | 28     | A   | 3.92 Å   |
| ILE  | 28     | A   | VAL  | 46     | A   | 4.96 Å   |
| ALA  | 29     | A   | VAL  | 50     | A   | 4.75 Å   |



|     |    |   |     |     |   |        |
|-----|----|---|-----|-----|---|--------|
| ALA | 29 | A | TRP | 152 | A | 4.81 Å |
| VAL | 30 | A | ILE | 37  | A | 4.44 Å |
| VAL | 30 | A | LEU | 38  | A | 4.95 Å |
| VAL | 30 | A | ALA | 41  | A | 3.75 Å |
| VAL | 30 | A | VAL | 46  | A | 4.39 Å |
| VAL | 30 | A | ILE | 49  | A | 4.05 Å |
| PHE | 35 | A | LEU | 38  | A | 4.19 Å |
| PHE | 35 | A | VAL | 51  | A | 4.98 Å |
| PHE | 35 | A | ALA | 136 | A | 4.86 Å |
| PHE | 35 | A | LEU | 143 | A | 4.36 Å |
| LEU | 38 | A | ILE | 49  | A | 4.06 Å |
| LEU | 38 | A | VAL | 51  | A | 4.63 Å |
| LEU | 38 | A | LEU | 143 | A | 4.76 Å |
| ALA | 41 | A | VAL | 46  | A | 4.11 Å |
| ALA | 41 | A | ILE | 49  | A | 3.91 Å |
| ILE | 42 | A | ILE | 49  | A | 3.75 Å |
| ILE | 42 | A | LEU | 143 | A | 4.75 Å |
| ILE | 42 | A | LEU | 146 | A | 4.54 Å |
| ILE | 42 | A | ALA | 148 | A | 4.07 Å |
| VAL | 46 | A | ILE | 49  | A | 4.56 Å |
| ILE | 49 | A | VAL | 51  | A | 4.47 Å |
| ILE | 49 | A | LEU | 143 | A | 4.59 Å |
| ILE | 49 | A | ALA | 148 | A | 4.78 Å |
| VAL | 50 | A | TRP | 152 | A | 4.63 Å |
| VAL | 51 | A | ILE | 140 | A | 4.83 Å |
| VAL | 51 | A | LEU | 143 | A | 4.22 Å |
| VAL | 51 | A | ILE | 151 | A | 4.42 Å |
| VAL | 51 | A | VAL | 153 | A | 4.79 Å |
| LEU | 56 | A | ILE | 58  | A | 4.20 Å |
| LEU | 56 | A | ILE | 99  | A | 4.46 Å |
| LEU | 56 | A | LEU | 107 | A | 4.74 Å |
| LEU | 56 | A | LEU | 110 | A | 4.37 Å |
| LEU | 56 | A | VAL | 127 | A | 4.82 Å |
| ILE | 58 | A | PHE | 60  | A | 4.78 Å |
| ILE | 58 | A | LEU | 75  | A | 4.33 Å |
| ILE | 58 | A | VAL | 97  | A | 4.30 Å |
| ILE | 58 | A | ILE | 99  | A | 4.48 Å |
| ILE | 58 | A | LEU | 110 | A | 4.99 Å |
| ILE | 58 | A | ALA | 114 | A | 4.94 Å |
| ILE | 58 | A | VAL | 125 | A | 4.85 Å |
| ILE | 58 | A | VAL | 127 | A | 4.97 Å |
| VAL | 59 | A | ALA | 94  | A | 3.82 Å |
| PHE | 60 | A | LEU | 68  | A | 3.70 Å |
| PHE | 60 | A | ALA | 71  | A | 4.77 Å |
| PHE | 60 | A | LEU | 75  | A | 4.84 Å |
| PHE | 60 | A | LEU | 95  | A | 4.28 Å |
| PHE | 60 | A | VAL | 97  | A | 4.73 Å |
| PHE | 60 | A | ALA | 114 | A | 4.61 Å |
| PHE | 60 | A | LEU | 117 | A | 4.47 Å |
| PHE | 60 | A | ALA | 118 | A | 4.87 Å |
| PHE | 60 | A | ILE | 123 | A | 4.96 Å |
| PHE | 60 | A | VAL | 125 | A | 4.89 Å |
| ALA | 63 | A | ALA | 67  | A | 4.12 Å |
| ALA | 63 | A | LEU | 68  | A | 4.93 Å |
| ALA | 63 | A | ILE | 123 | A | 4.50 Å |
| ALA | 67 | A | PHE | 121 | A | 4.47 Å |
| LEU | 68 | A | LEU | 90  | A | 4.33 Å |
| LEU | 68 | A | LEU | 95  | A | 3.95 Å |
| LEU | 68 | A | ILE | 123 | A | 4.27 Å |
| ALA | 71 | A | PHE | 121 | A | 4.80 Å |
| ALA | 71 | A | ILE | 123 | A | 4.33 Å |

|     |     |   |     |     |   |        |
|-----|-----|---|-----|-----|---|--------|
| ALA | 72  | A | VAL | 88  | A | 4.09 Å |
| ALA | 72  | A | LEU | 95  | A | 4.24 Å |
| ALA | 72  | A | VAL | 97  | A | 4.92 Å |
| LEU | 75  | A | VAL | 97  | A | 4.45 Å |
| LEU | 75  | A | ILE | 99  | A | 4.26 Å |
| LEU | 75  | A | LEU | 110 | A | 4.44 Å |
| LEU | 75  | A | LEU | 113 | A | 4.75 Å |
| LEU | 75  | A | ALA | 114 | A | 4.92 Å |
| LEU | 75  | A | LEU | 117 | A | 4.22 Å |
| LEU | 76  | A | LEU | 80  | A | 4.95 Å |
| LEU | 76  | A | VAL | 86  | A | 4.86 Å |
| LEU | 76  | A | VAL | 88  | A | 4.90 Å |
| ALA | 78  | A | LEU | 110 | A | 3.72 Å |
| ALA | 78  | A | LEU | 113 | A | 4.71 Å |
| ALA | 79  | A | ALA | 84  | A | 3.99 Å |
| ALA | 79  | A | VAL | 86  | A | 4.72 Å |
| ALA | 79  | A | ILE | 99  | A | 4.50 Å |
| ALA | 79  | A | LEU | 110 | A | 4.76 Å |
| LEU | 80  | A | VAL | 86  | A | 4.92 Å |
| LEU | 82  | A | VAL | 102 | A | 4.61 Å |
| LEU | 82  | A | LEU | 110 | A | 4.14 Å |
| ALA | 84  | A | VAL | 86  | A | 4.26 Å |
| ALA | 84  | A | ILE | 99  | A | 3.97 Å |
| ALA | 84  | A | VAL | 102 | A | 4.71 Å |
| ALA | 84  | A | LEU | 110 | A | 4.95 Å |
| VAL | 85  | A | ALA | 156 | A | 4.77 Å |
| VAL | 86  | A | VAL | 88  | A | 3.90 Å |
| VAL | 86  | A | VAL | 97  | A | 3.73 Å |
| VAL | 86  | A | ILE | 99  | A | 4.73 Å |
| VAL | 88  | A | LEU | 95  | A | 4.32 Å |
| VAL | 88  | A | VAL | 97  | A | 4.78 Å |
| LEU | 90  | A | LEU | 95  | A | 4.48 Å |
| LEU | 95  | A | VAL | 97  | A | 4.27 Å |
| VAL | 97  | A | ILE | 99  | A | 5.00 Å |
| ILE | 99  | A | VAL | 102 | A | 4.53 Å |
| ILE | 99  | A | LEU | 107 | A | 4.13 Å |
| ILE | 99  | A | LEU | 110 | A | 4.63 Å |
| VAL | 102 | A | PRO | 103 | A | 4.79 Å |
| VAL | 102 | A | LEU | 107 | A | 4.92 Å |
| VAL | 102 | A | LEU | 110 | A | 4.97 Å |
| LEU | 107 | A | LEU | 110 | A | 4.96 Å |
| LEU | 110 | A | LEU | 113 | A | 4.47 Å |
| LEU | 113 | A | LEU | 117 | A | 4.91 Å |
| ALA | 114 | A | VAL | 125 | A | 4.17 Å |
| ALA | 114 | A | VAL | 127 | A | 4.16 Å |
| LEU | 117 | A | PHE | 121 | A | 4.85 Å |
| ALA | 118 | A | ILE | 123 | A | 4.31 Å |
| ALA | 118 | A | VAL | 125 | A | 3.90 Å |
| PHE | 121 | A | ILE | 123 | A | 4.62 Å |
| VAL | 125 | A | VAL | 127 | A | 4.71 Å |
| PRO | 133 | A | TRP | 160 | A | 4.87 Å |
| PRO | 133 | A | LEU | 164 | A | 4.16 Å |
| PRO | 133 | A | LEU | 167 | A | 3.80 Å |
| ALA | 136 | A | ILE | 140 | A | 4.82 Å |
| ALA | 136 | A | TRP | 160 | A | 4.75 Å |
| ALA | 136 | A | LEU | 164 | A | 4.47 Å |
| LEU | 137 | A | ILE | 140 | A | 4.82 Å |
| LEU | 137 | A | LEU | 164 | A | 4.49 Å |
| LEU | 137 | A | LEU | 167 | A | 4.70 Å |
| ILE | 140 | A | ILE | 151 | A | 4.51 Å |
| ILE | 140 | A | VAL | 153 | A | 4.78 Å |

|     |     |   |     |     |   |        |
|-----|-----|---|-----|-----|---|--------|
| ILE | 140 | A | LEU | 164 | A | 4.80 Å |
| LEU | 143 | A | LEU | 146 | A | 4.43 Å |
| LEU | 143 | A | ALA | 148 | A | 4.37 Å |
| LEU | 143 | A | ILE | 151 | A | 4.38 Å |
| ALA | 148 | A | ILE | 151 | A | 4.14 Å |
| ILE | 151 | A | VAL | 153 | A | 4.43 Å |
| VAL | 153 | A | TRP | 160 | A | 4.77 Å |
| VAL | 153 | A | LEU | 161 | A | 4.58 Å |
| VAL | 153 | A | LEU | 164 | A | 4.07 Å |
| VAL | 158 | A | LEU | 161 | A | 4.87 Å |
| VAL | 158 | A | LEU | 162 | A | 4.82 Å |
| TRP | 160 | A | LEU | 161 | A | 4.83 Å |
| TRP | 160 | A | LEU | 164 | A | 4.73 Å |
| LEU | 162 | A | LEU | 165 | A | 4.92 Å |

\*\*ionic (19 total):\*\*

| Res1 | idRes1 | Ch1 | Res2 | idRes2 | Ch2 | Distance |
|------|--------|-----|------|--------|-----|----------|
| LYS  | 10     | A   | ASP  | 11     | A   | 4.08 Å   |
| LYS  | 15     | A   | GLU  | 18     | A   | 5.43 Å   |
| GLU  | 18     | A   | LYS  | 22     | A   | 2.82 Å   |
| ASP  | 34     | A   | ARG  | 96     | A   | 5.55 Å   |
| ASP  | 34     | A   | ARG  | 128    | A   | 5.08 Å   |
| ASP  | 36     | A   | ARG  | 39     | A   | 3.73 Å   |
| ASP  | 36     | A   | ARG  | 128    | A   | 5.50 Å   |
| ARG  | 39     | A   | GLU  | 43     | A   | 4.66 Å   |
| GLU  | 47     | A   | LYS  | 149    | A   | 2.66 Å   |
| ASP  | 64     | A   | ARG  | 70     | A   | 5.41 Å   |
| ARG  | 74     | A   | GLU  | 120    | A   | 5.82 Å   |
| ASP  | 91     | A   | ARG  | 96     | A   | 4.87 Å   |
| GLU  | 104    | A   | ARG  | 111    | A   | 4.40 Å   |
| ASP  | 106    | A   | ARG  | 109    | A   | 4.42 Å   |
| GLU  | 108    | A   | ARG  | 111    | A   | 3.85 Å   |
| GLU  | 108    | A   | ARG  | 115    | A   | 5.22 Å   |
| GLU  | 126    | A   | ARG  | 128    | A   | 3.68 Å   |
| GLU  | 134    | A   | LYS  | 163    | A   | 5.65 Å   |
| ARG  | 135    | A   | GLU  | 139    | A   | 5.20 Å   |

\*\*hbond\_side\_side (1 total):\*\*

| Res1 | idRes1 | Ch1 | Res2 | idRes2 | Ch2 | Distance |
|------|--------|-----|------|--------|-----|----------|
| SER  | 52     | A   | ARG  | 98     | A   | 3.34 Å   |

Table S–XIII. Summary from ProtInter Calculator for [TFD-EE MPNN, PDB: 9QUP].  
Intermolecular Interface Interactions Between Chain A and Chain B

**\*\*hydrophobic (56 total):\*\***

| Res1 | idRes1 | Ch1 | Res2 | idRes2 | Ch2 | Distance |
|------|--------|-----|------|--------|-----|----------|
| MET  | 1      | A   | ILE  | 140    | B   | 4.99 Å   |
| MET  | 1      | A   | ILE  | 151    | B   | 4.84 Å   |
| MET  | 1      | A   | VAL  | 153    | B   | 4.91 Å   |
| MET  | 1      | A   | LEU  | 164    | B   | 4.17 Å   |
| PHE  | 3      | A   | VAL  | 153    | B   | 4.90 Å   |
| PHE  | 3      | A   | LEU  | 161    | B   | 4.88 Å   |
| PHE  | 3      | A   | LEU  | 164    | B   | 4.63 Å   |
| PHE  | 3      | A   | LEU  | 165    | B   | 4.78 Å   |
| VAL  | 5      | A   | LEU  | 161    | B   | 4.93 Å   |
| TRP  | 6      | A   | VAL  | 85     | B   | 4.56 Å   |
| TRP  | 6      | A   | ALA  | 156    | B   | 4.48 Å   |
| ALA  | 19     | A   | VAL  | 158    | B   | 4.23 Å   |
| ALA  | 19     | A   | LEU  | 162    | B   | 4.82 Å   |
| LEU  | 20     | A   | VAL  | 158    | B   | 4.00 Å   |
| LEU  | 20     | A   | LEU  | 161    | B   | 4.87 Å   |
| LEU  | 20     | A   | LEU  | 162    | B   | 4.98 Å   |
| LEU  | 20     | A   | LEU  | 165    | B   | 4.99 Å   |
| ALA  | 23     | A   | LEU  | 162    | B   | 4.92 Å   |
| ALA  | 23     | A   | LEU  | 165    | B   | 4.64 Å   |
| ALA  | 25     | A   | LEU  | 165    | B   | 4.66 Å   |
| VAL  | 50     | A   | ILE  | 4      | B   | 4.79 Å   |
| ALA  | 72     | A   | LEU  | 76     | B   | 4.89 Å   |
| ALA  | 72     | A   | LEU  | 80     | B   | 4.59 Å   |
| LEU  | 76     | A   | LEU  | 76     | B   | 4.45 Å   |
| LEU  | 80     | A   | VAL  | 88     | B   | 4.81 Å   |
| LEU  | 80     | A   | LEU  | 90     | B   | 4.28 Å   |
| LEU  | 80     | A   | LEU  | 95     | B   | 4.77 Å   |
| VAL  | 85     | A   | TRP  | 6      | B   | 4.74 Å   |
| VAL  | 85     | A   | ALA  | 89     | B   | 4.81 Å   |
| VAL  | 88     | A   | LEU  | 76     | B   | 4.21 Å   |
| VAL  | 88     | A   | LEU  | 80     | B   | 4.95 Å   |
| ALA  | 89     | A   | VAL  | 85     | B   | 4.71 Å   |
| LEU  | 90     | A   | LEU  | 80     | B   | 4.56 Å   |
| LEU  | 95     | A   | LEU  | 80     | B   | 4.41 Å   |
| LEU  | 137    | A   | MET  | 1      | B   | 4.86 Å   |
| ILE  | 140    | A   | MET  | 1      | B   | 4.95 Å   |
| ILE  | 151    | A   | MET  | 1      | B   | 4.83 Å   |
| TRP  | 152    | A   | ILE  | 4      | B   | 4.54 Å   |
| TRP  | 152    | A   | TRP  | 152    | B   | 4.78 Å   |
| VAL  | 153    | A   | MET  | 1      | B   | 4.87 Å   |
| VAL  | 153    | A   | PHE  | 3      | B   | 4.96 Å   |
| ALA  | 156    | A   | TRP  | 6      | B   | 4.69 Å   |
| VAL  | 158    | A   | ALA  | 19     | B   | 4.76 Å   |
| VAL  | 158    | A   | LEU  | 20     | B   | 3.92 Å   |
| LEU  | 161    | A   | PHE  | 3      | B   | 4.03 Å   |
| LEU  | 161    | A   | VAL  | 5      | B   | 4.49 Å   |
| LEU  | 161    | A   | LEU  | 20     | B   | 4.90 Å   |
| LEU  | 162    | A   | ALA  | 19     | B   | 4.87 Å   |
| LEU  | 162    | A   | LEU  | 20     | B   | 4.34 Å   |
| LEU  | 162    | A   | ALA  | 23     | B   | 4.88 Å   |
| LEU  | 164    | A   | MET  | 1      | B   | 4.23 Å   |
| LEU  | 164    | A   | PHE  | 3      | B   | 4.61 Å   |
| LEU  | 165    | A   | PHE  | 3      | B   | 4.28 Å   |
| LEU  | 165    | A   | LEU  | 20     | B   | 4.76 Å   |
| LEU  | 165    | A   | ALA  | 23     | B   | 4.88 Å   |

LEU 165 A ALA 25 B 4.92 Å

\*\*ionic (7 total):\*\*

| Res1 | idRes1 | Ch1 | Res2 | idRes2 | Ch2 | Distance |
|------|--------|-----|------|--------|-----|----------|
| ARG  | 69     | A   | ASP  | 77     | B   | 3.88 Å   |
| ARG  | 69     | A   | GLU  | 81     | B   | 5.04 Å   |
| LYS  | 73     | A   | ASP  | 77     | B   | 4.86 Å   |
| ASP  | 77     | A   | ARG  | 69     | B   | 3.22 Å   |
| ASP  | 77     | A   | LYS  | 73     | B   | 3.70 Å   |
| GLU  | 81     | A   | ARG  | 65     | B   | 4.89 Å   |
| GLU  | 81     | A   | ARG  | 69     | B   | 3.52 Å   |

## S8—REFERENCES

1. Chiu, J., et al., *Site-directed, Ligase-Independent Mutagenesis (SLIM): a single-tube methodology approaching 100% efficiency in 4 h*. Nucleic acids research, 2004. **32**(21): p. e174-e174.
2. McGibbon, R.T., et al., *MDTraj: a modern open library for the analysis of molecular dynamics trajectories*. Biophysical journal, 2015. **109**(8): p. 1528-1532.
3. Gowers, R.J., et al., *MDAnalysis: a Python package for the rapid analysis of molecular dynamics simulations*. 2019, Los Alamos National Laboratory (LANL), Los Alamos, NM (United States).
4. Michaud-Agrawal, N., et al., *MDAnalysis: a toolkit for the analysis of molecular dynamics simulations*. Journal of computational chemistry, 2011. **32**(10): p. 2319-2327.
5. Janin, J., et al., *Conformation of amino acid side-chains in proteins*. Journal of molecular biology, 1978. **125**(3): p. 357-386.
6. Case, D.A., et al., *AmberTools*. Journal of chemical information and modeling, 2023. **63**(20): p. 6183-6191.
7. Valdés-Tresanco, M.S., et al., *gmx\_MMPBSA: a new tool to perform end-state free energy calculations with GROMACS*. Journal of chemical theory and computation, 2021. **17**(10): p. 6281-6291.
